# Supplementary material for: Age-related and disease locus-specific mechanisms contribute to early remodelling of chromatin structure in Huntington’s disease mice
Source: PubMed Central journal article supplement (PMC7807045; doi:10.1038/s41467-020-20605-2), 2021-01-13
Supplement: 41467_2020_20605_MOESM1_ESM.pdf [file 41467_2020_20605_MOESM1_ESM.pdf]

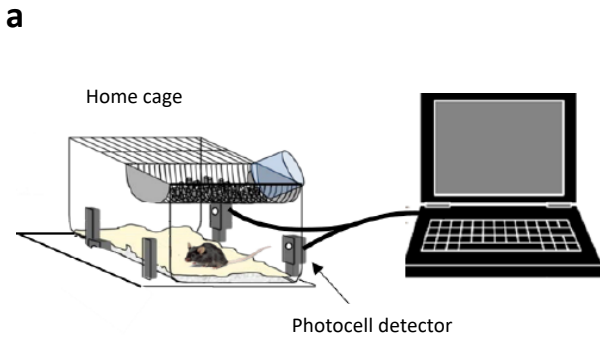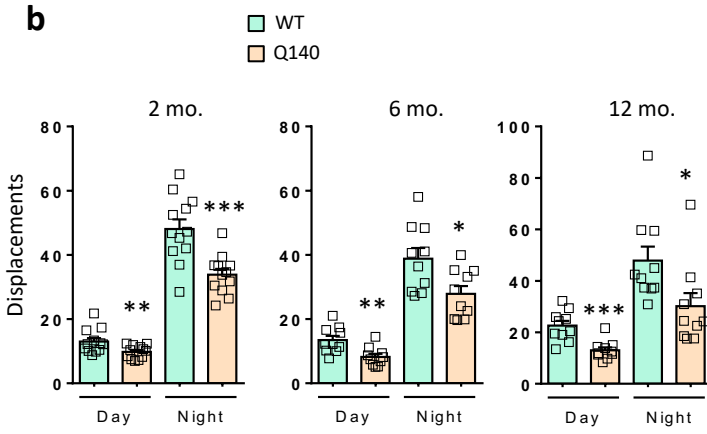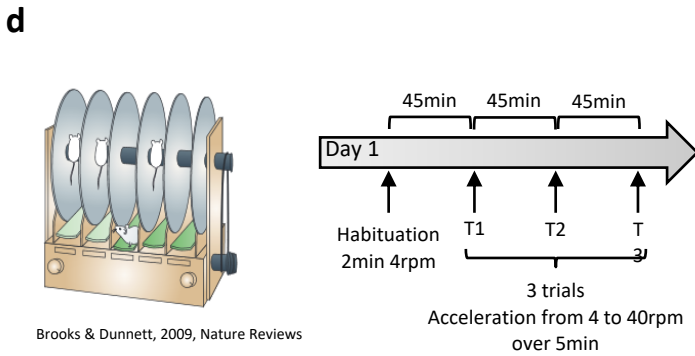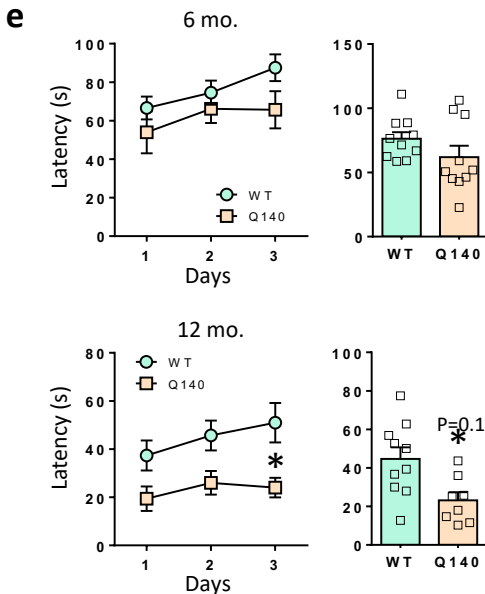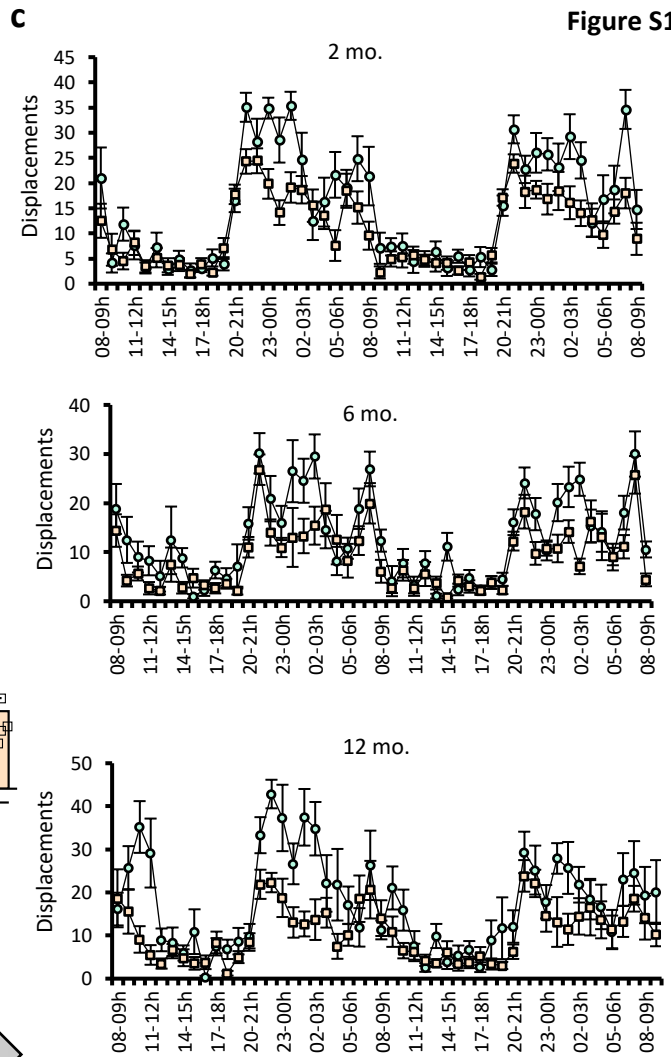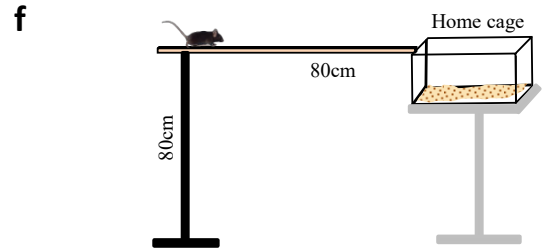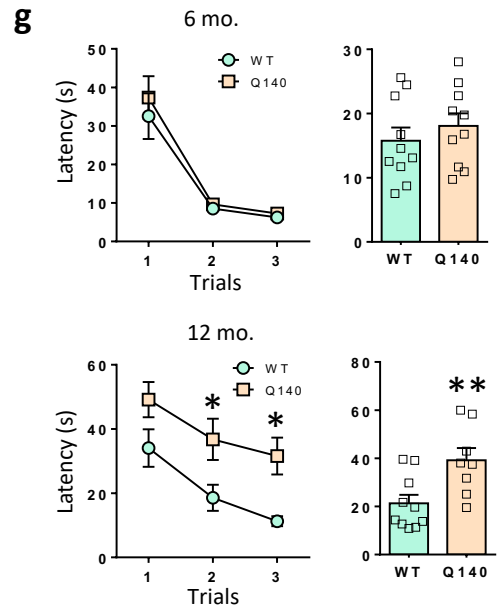

## Supplementary Fig. 1

### Behavioural analysis of HD Q140 mice

**a**, Scheme representing actography equipment to measure spontaneous locomotor activity. The setup is composed of two photocell detectors positioned at the front and back of the cage, connected to a computer. A longitudinal displacement is recorded when the two detectors are successively interrupted. **b**, Bar graphs showing spontaneous locomotor activity as mean  $\pm$  sem of number of longitudinal displacements during the day and night phases at 2, 6 and 12 months of age for WT and Q140 het mice.  $n=12$  WT mice and  $n=12$  Q140 mice at 2 months;  $n=10$  WT mice and  $n=10$  Q140 mice at 6 months;  $n=10$  WT and  $n=10$  Q140 mice at 12 months. Data were analysed using unpaired two-tailed  $t$ -test:  $*P_{2m\text{-day}} = 0.0167$ ,  $***P_{2m\text{-night}} = 0.0005$ ,  $**P_{6m\text{-day}} = 0.0042$ ,  $*P_{6m\text{-night}} = 0.0153$ ,  $***P_{12m\text{-day}} = 0.0004$ ,  $*P_{12m\text{-night}} = 0.028$ , WT vs Q140 mice. **c**, Graphs showing the mean  $\pm$  sem of the number of displacements/hour for a total of 48 consecutive hours (2 days and 2 nights) at 2, 6 and 12 months of age for WT and Q140 mice. **d**, Scheme showing rotarod motor coordination test device and protocol. Mice were positioned on a rotating cylinder undergoing progressing acceleration over time (0-40 rpms over 5 min). 45 min before the test, a first habituation was performed with a constant speed of 4 rpms for 2 min and with a delay of 45 min. 3 additional trials were performed with the accelerating procedure. **e**, On the left, graphs showing the curves of tendency for latency to fall (mean  $\pm$  sem) for 6 and 12 month-old WT and Q140 het mice along the 3 days of test.  $n=10$  WT mice and  $n=10$  Q140 mice at 6 months;  $n=10$  WT mice and  $n=8$  Q140 mice at 12 months. Data were analysed using one-way Anova with repeated measures; multiple comparisons used the Newman-Keuls post-hoc test,  $*p < 0.05$ , Q140 vs WT comparison. On the right, bar graphs showing mean latency across the 3 days of test ( $\pm$  sem). Data were analysed using unpaired two-tailed  $t$ -test:  $P_{6m} = 0.182$ ,  $*P_{12m} = 0.0132$ , WT vs Q140 mice. **f**, Scheme showing bar test paradigm for motor coordination and balance assessment. The device is composed of a thin (1cm) raised bar (80cm above ground) that mice have to cross to reach their home cage. Latency to reach home-cage was recorded. **g**, On the left, graphs showing the latency to cross the bar (mean  $\pm$  sem) over 3 different trials for WT and Q140 het mice at 6 and 12 months of age.  $n=10$  WT mice and  $n=10$  Q140 mice at 6 months;  $n=10$  WT mice and  $n=8$  Q140 mice at 12 months. Data were analysed using one-way Anova with repeated measures; multiple comparisons used the Newman-Keuls post-hoc test,  $*$ ,  $p < 0.05$ , Q140 vs WT comparison. On the right, bar graphs showing mean latency across the 3 days of test ( $\pm$  sem). Data were analysed using unpaired two-tailed  $t$ -test:  $P_{6m} = 0.4232$ ,  $**P_{12m} = 0.009$ , WT vs Q140 mice. Source data are provided as a Source Data file.

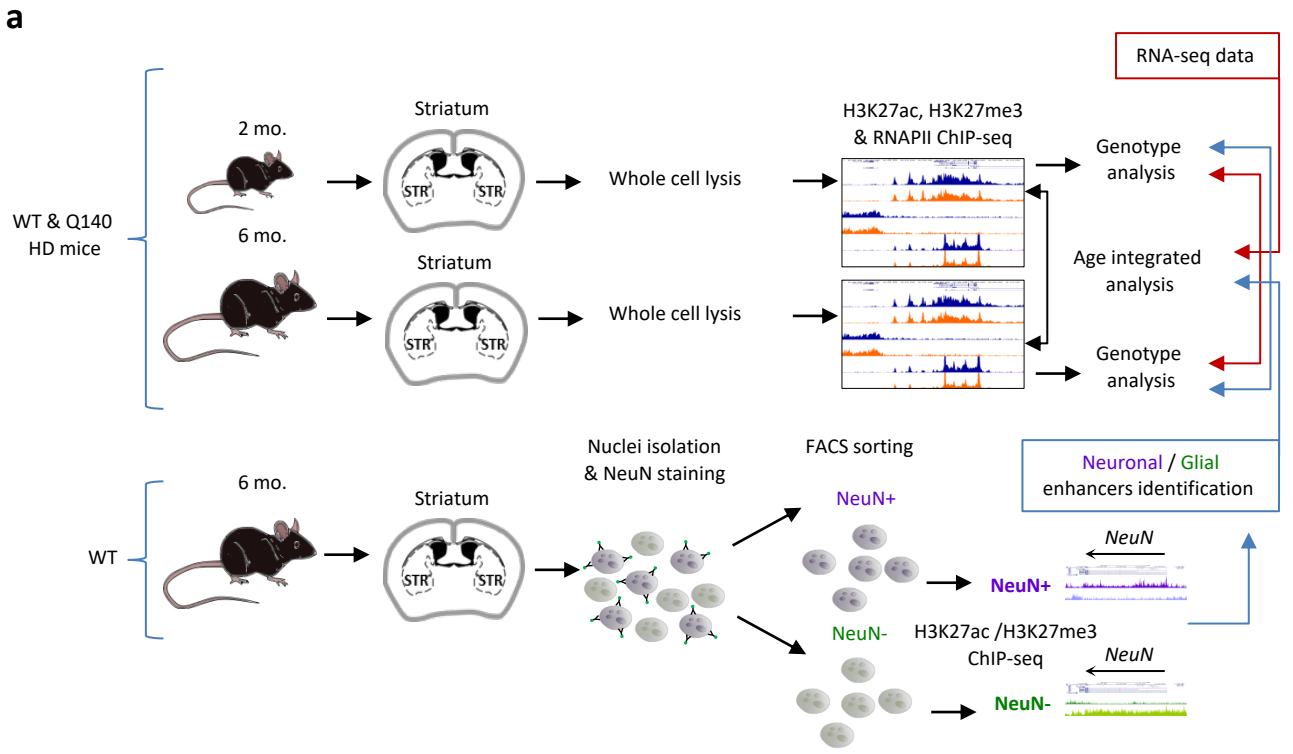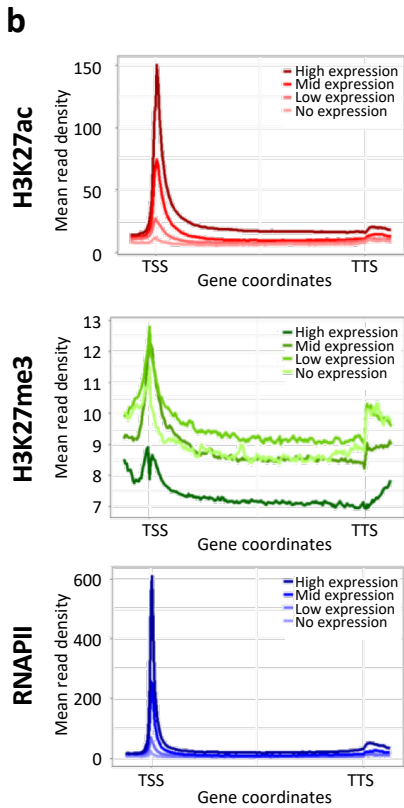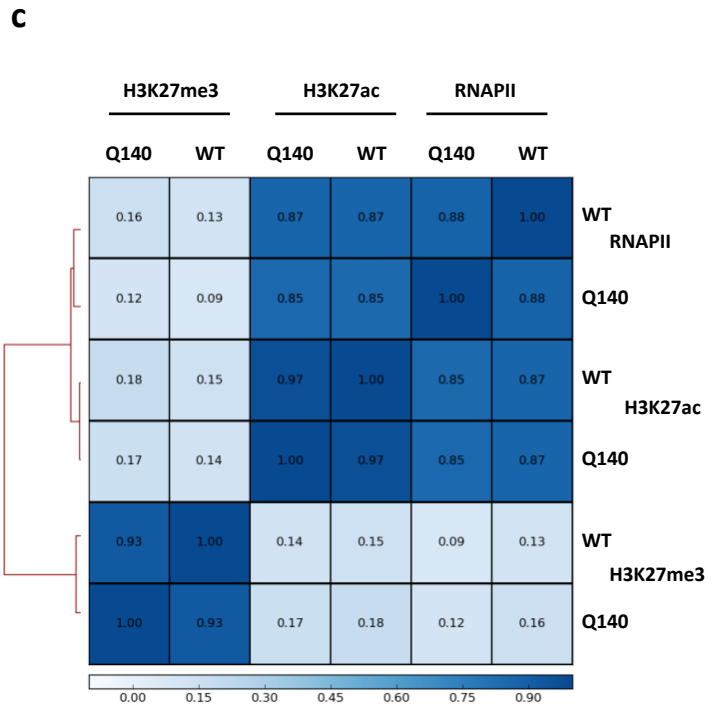

**Supplementary Fig. 2. Quality of H3K27ac, H3K27me3 and RNAPII ChIPseq data generated on bulk, neuronal and non-neuronal striatal tissue in Q140 and WT mice of 2 and 6 months: complementary information and analyses.** **a.** Scheme showing the different ChIP-seq datasets generated using whole striatal tissue or NeuN+/NeuN- sorted nuclei from Q140 mice and integration with transcriptomic databases<sup>5,10</sup>. **b.** Representative gene metaprofiles for H3K27ac, H3K27me3 and RNAPII at no-, low-, mid- and high-expressed genes in the striatum. No-, low-, mid- and high-expressed genes were delineated according to quartile distribution of normalized striatal RNAseq values (i.e. no-expressed < 1<sup>st</sup>, 1<sup>st</sup> < low-expressed < 2<sup>nd</sup>, 2<sup>nd</sup> < mid-expressed < 3<sup>rd</sup>, high-expressed > 4<sup>th</sup> quartiles). H3K27ac, H3K27me3 and RNAPII ChIPseq data and RNAseq data generated on WT striatum at 6 months were used in the analysis. TSS, Transcription Start Site; TTS, Transcription Termination Site. As expected, H3K27ac and RNAPII signals are proportional to gene expression levels, in contrast to H3K27me3. **c.** Correlation heatmap for H3K27ac, H3K27Me3 and RNAPII in WT and Q140 striatum. This example heatmap was generated using ChIPseq data generated on the striatum of WT male mice of 6 months of age, and computing read enrichment every 5Kb bins across the entire genome. Spearman correlation coefficients are provided for each regression. As expected, H3K27ac and RNAPII signals are highly correlated, in contrast to H3K27me3 with H3K27ac or RNAPII. Source data are provided as a Source Data file.

a

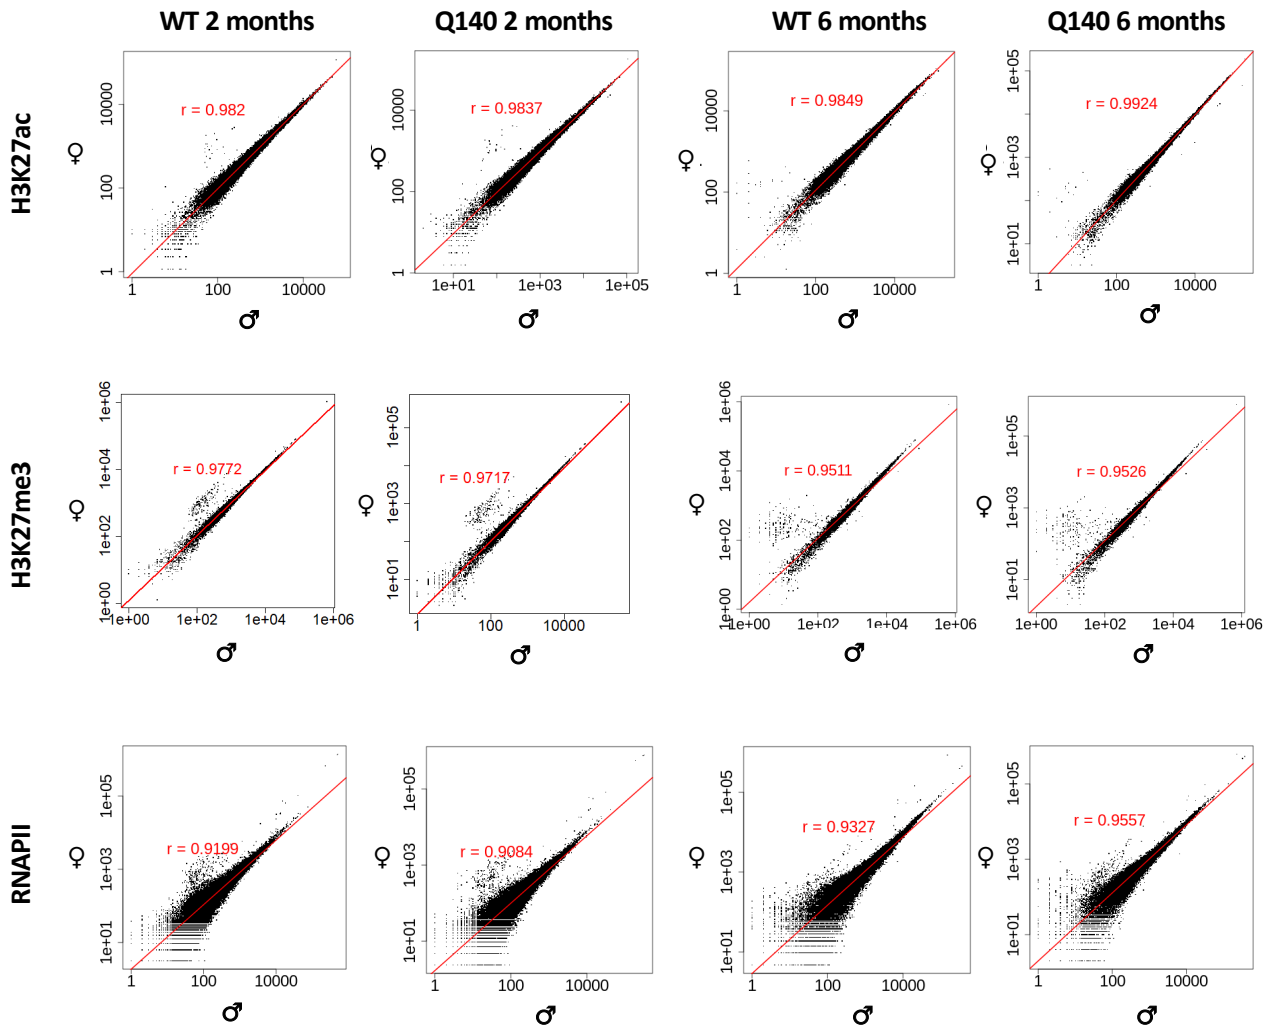

b

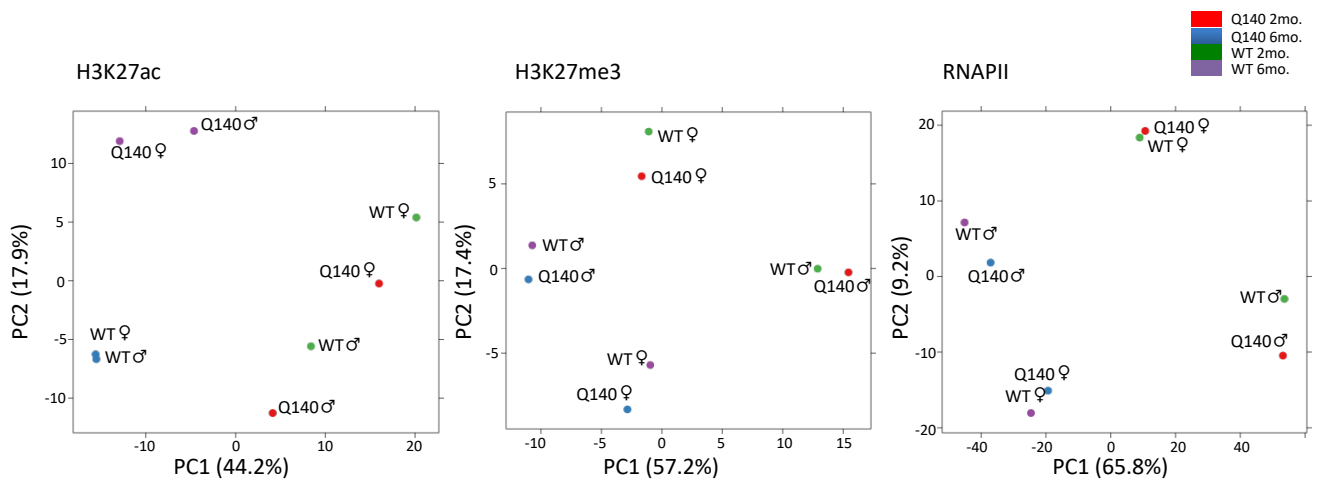

**Supplementary Fig. 3. Exploratory analysis of H3K27ac, H3K27me3 and RNAPII ChIPseq data generated on bulk striatal tissue in Q140 and WT mice of 2 and 6 months: complementary information and analyses**

**a**, Scatterplots showing the comparison of ChIPseq read count per peak between male and female samples for H3K27ac (upper panel), H3K27me3 (middle panel) and RNAPII (lower panel) and for each condition (WT striatum at 2 months, WT2; Q140 striatum at 2 months, Q1402; WT striatum at 6 months, WT6; Q140 striatum at 6 months, Q1406). **b**, Variance observation between H3K27ac (left), H3K27me3 (middle) and RNAPII (right) ChIPseq datasets generated on the striatum of male and female Q140 and WT mice of 2 and 6 months. ChIPseq experiments using Q140 and WT samples of specific age and sex were performed simultaneously. Experiments performed on different sexes and at different ages were conducted at different times. Principal component analysis (PCA) was computed on variance stabilized data using the method proposed by Anders and Huber<sup>55</sup>. Sample colours indicate groups (Q140 2 months, red; Q140 6 months, blue; WT 2 months, green; WT 6 months, purple). First factorial plans are represented. The first axis explains the major variability between the samples, predominantly separating them according to age.

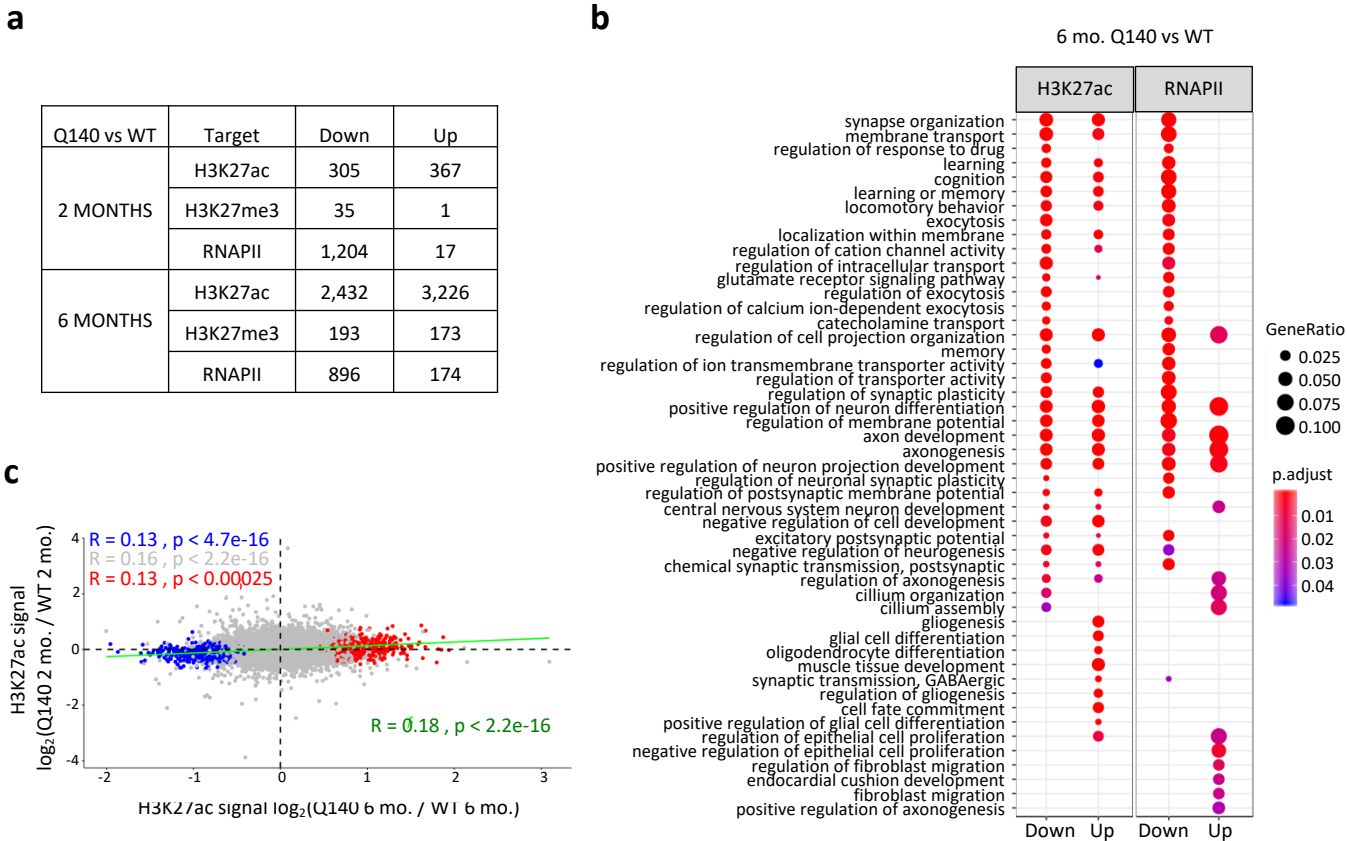

a

|          | 2 months |       |       |       | 6 months |       |       |       |
|----------|----------|-------|-------|-------|----------|-------|-------|-------|
|          | ♂        |       | ♀     |       | ♂        |       | ♀     |       |
|          | Down     | Up    | Down  | Up    | Down     | Up    | Down  | Up    |
| H3K27ac  | 1,478    | 1,939 | 1,193 | 1,874 | 6,610    | 6,643 | 4,567 | 9,962 |
| H3K27me3 | 832      | 257   | 1,123 | 371   | 600      | 1,947 | 2,911 | 2,104 |
| RNAPII   | 6,681    | 2,523 | 7,843 | 844   | 8,531    | 2,506 | 2,858 | 3,338 |

b

H3K27ac

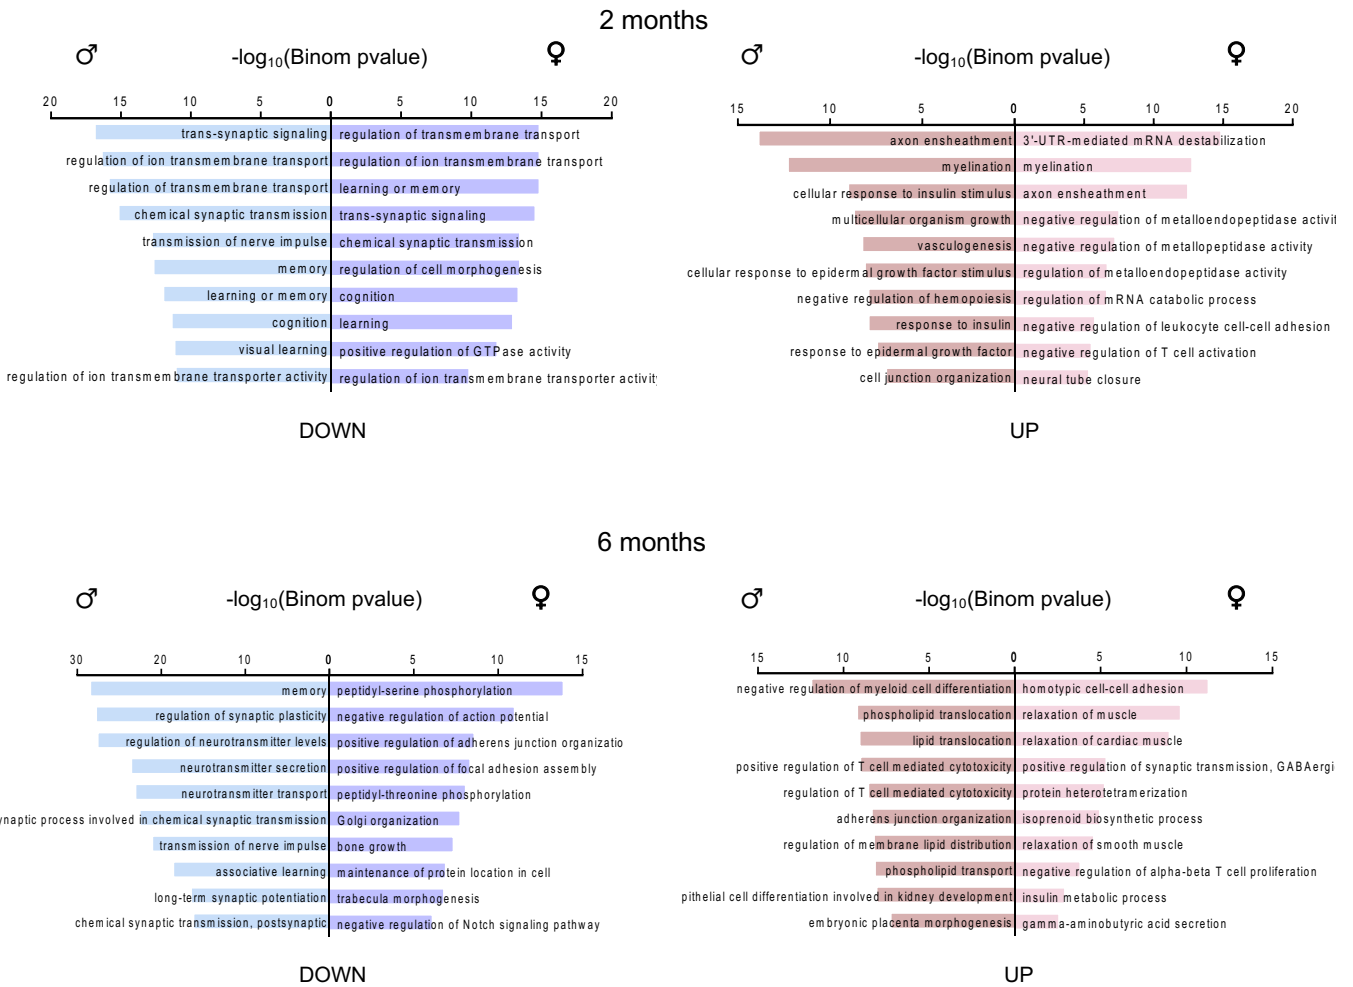

## Supplementary Fig. 5

**H3K27ac, H3K27me3 and RNAPII ChIPseq data generated on bulk striatal tissue in Q140 and WT mice of 2 and 6 months: independent analyses of male and female samples**

**a**, Summary table of regions showing differential enrichments in H3K27ac, H3K27me3 and RNAPII in Q140 vs WT striatum at 2 and 6 months using separate analysis for male and female samples. **b**, Gene Ontology analysis of regions shown in summary table, differentially enriched in H3K27ac in Q140 vs WT samples (FDR <0.05). Top 10 most significant terms are shown. Source data are provided as a Source Data file.



a

RNAPII

2 months

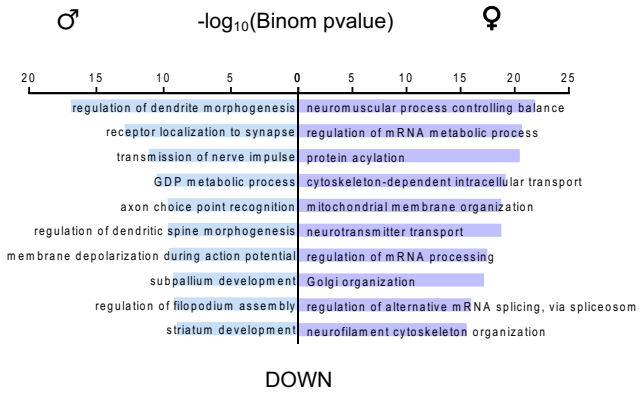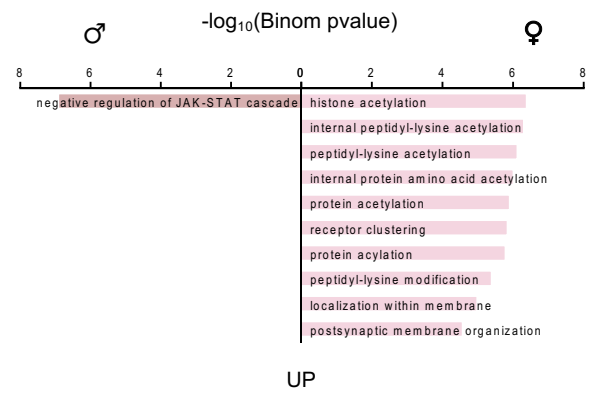

6 months

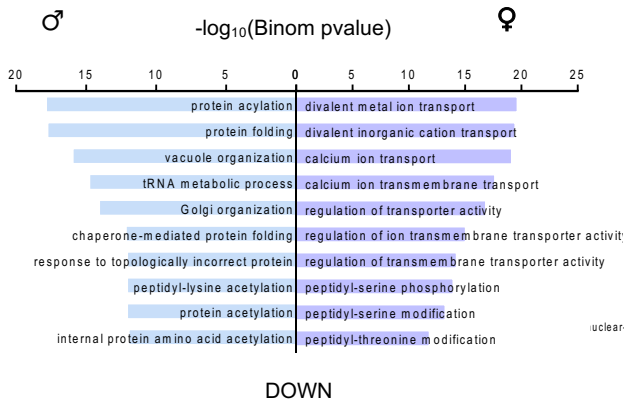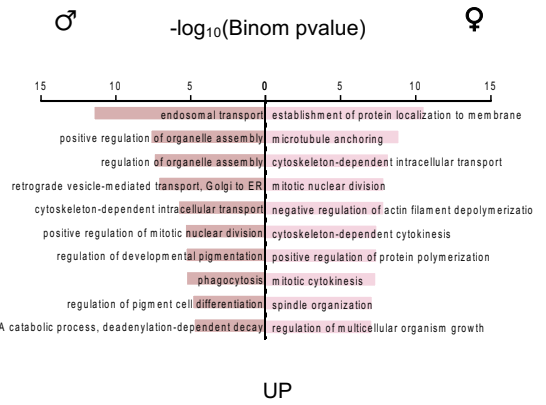

b

H3K27me3

2 months

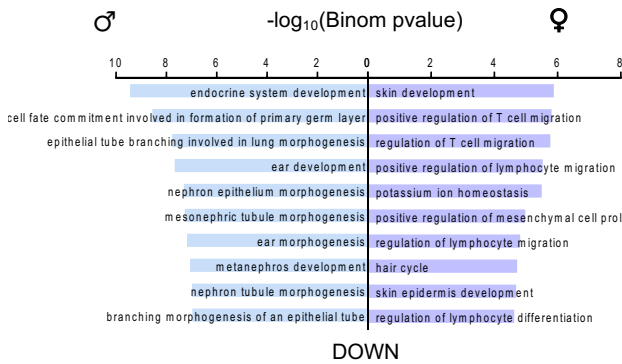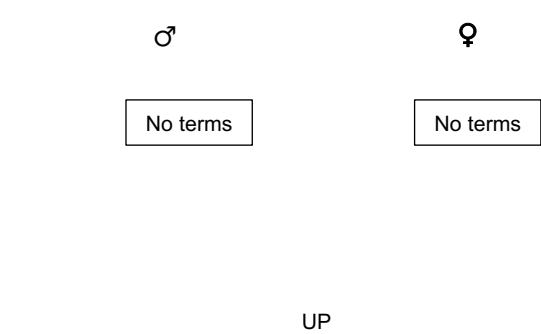

6 months

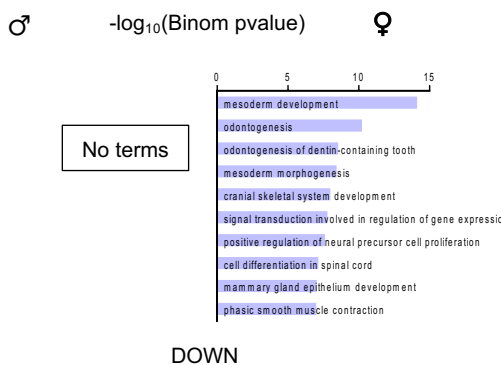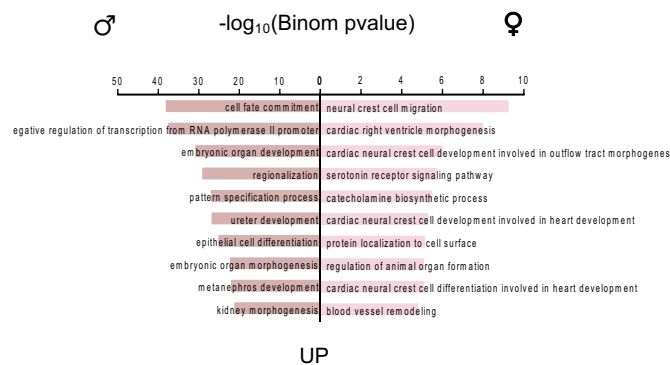

**Supplementary Fig. 6**

**RNAPII and H3K27me3 ChIPseq data generated on bulk striatal tissue in Q140 and WT mice of 2 and 6 months: independent analyses of male and female samples**

**a, b**, Gene Ontology analysis of regions shown in summary table presented in supplementary Fig. 5a, differentially enriched in RNAPII (a) and H3K27me3 (b) in Q140 vs WT samples (FDR <0.05). Top 10 most significant terms are shown. Source data are provided as a Source Data file.

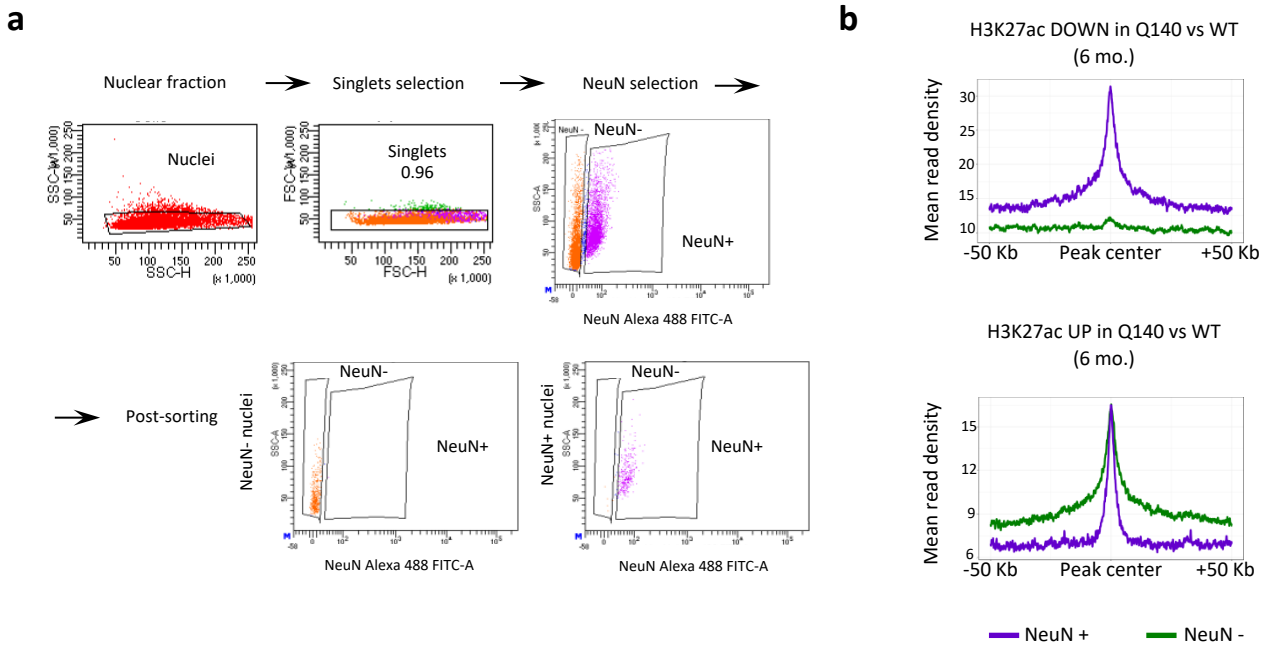

### Supplementary Fig. 7

#### H3K27ac, H3K27me3 and RNAPII ChIPseq data generated on neuronal and non-neuronal striatal tissue in Q140 and WT mice of 2 and 6 months: complementary information and analyses

**a**, Representative data showing flow cytometry results for sorting of striatal nuclei stained with NeuN neuronal marker. An initial gating using side scatter (SSC) of height (SSC-H) versus width (SSC-W) of the pulse signal detected was used to separate events corresponding to nuclear populations. A second gating strategy using forward scatter (FSC) of height (FSC-H) versus width (FSC-W) of the pulse signal detected was used to separate singlet events from doublet or multiplet nuclei. For NeuN +/- nuclear separation, NeuN channel signal (Alexa 488 FITC-A or Alexa 405) versus side scatter area (SSC-A) gating strategy was used. Post-sorting analysis of purified NeuN+ and NeuN- populations is shown as a control for purity assessment of sorted populations. **b**, Metaprofiles showing H3K27ac read count distribution in NeuN+ and NeuN- sorted ChIP-seq data, using differentially enriched peaks in Q140 vs WT striatum at 6 months. Source data are provided as a Source Data file.

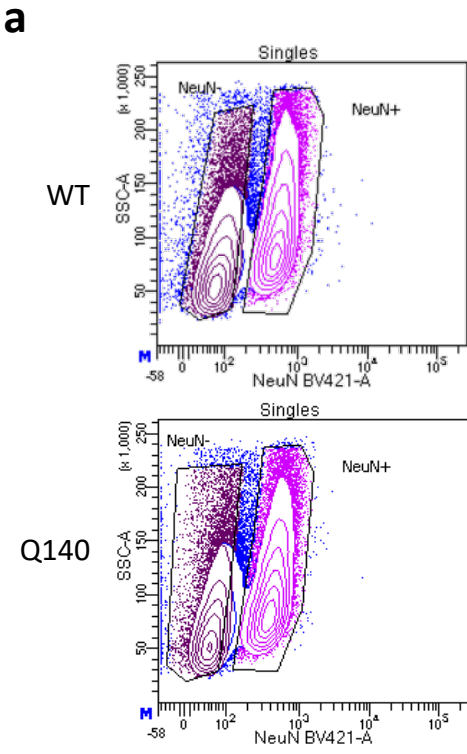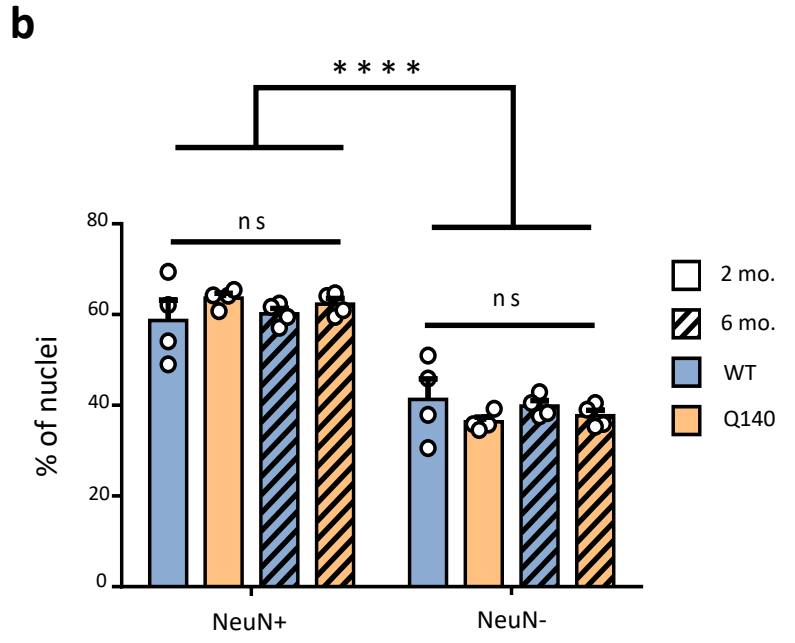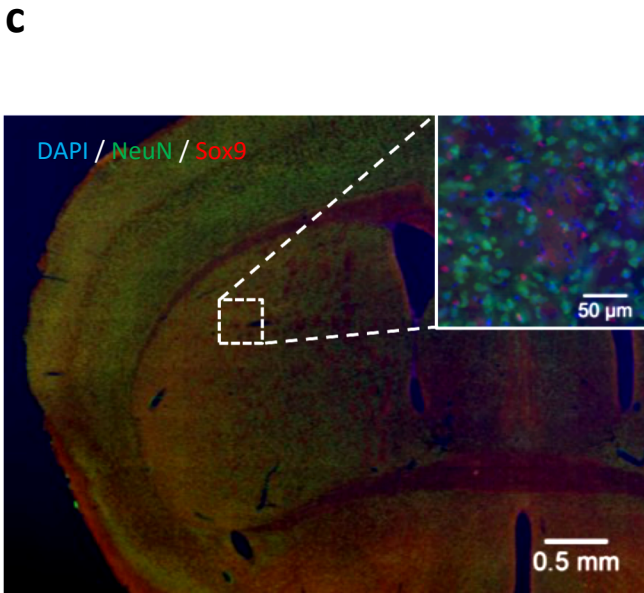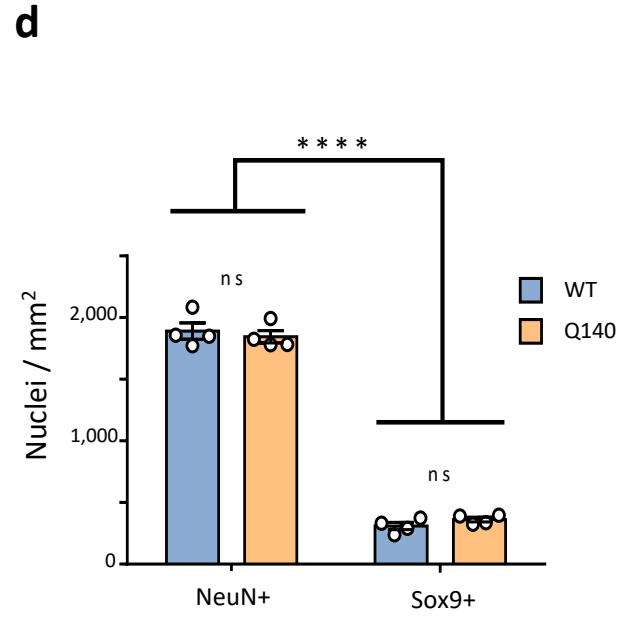

### Supplementary Fig. 8

#### The striatum of Q140 mice does not display significant alteration of the proportion of neuronal and glial cells at early disease stages

**a-b**, Neuronal (NeuN<sup>+</sup>) and non-neuronal (NeuN<sup>-</sup>) nuclear populations in the striatum of WT and Q140 mice at 2 and 6 months were analysed using the FANS approach. **a**, Representative dotplot showing the distribution of NeuN<sup>+</sup> (pink, right side) and NeuN<sup>-</sup> (purple, left side) singlet events in WT (top) and Q140 (bottom) striatum. **b**, Bargraphs showing the relative percentage of NeuN<sup>+</sup> vs NeuN<sup>-</sup> nuclei as a mean  $\pm$  sem in WT (blue) and Q140 (orange) striatum at 2 (clear background) and 6 (diagonal stripes) months of age (n=4 animals per group). Individual values are depicted as white circles. Data were analysed using two-way Anova; multiple comparisons used the Tukey's post-hoc test, \*\*\*\*,  $p < 0.0001$ , NeuN<sup>+</sup> vs NeuN<sup>-</sup> comparison.

**c-d**, Immunohistological analysis of NeuN (neuronal marker) and Sox9 (astrocytic marker) in WT and Q140 striatum at 2 months of age (n= 4 animals per group). **c**, Representative image showing the staining pattern of NeuN (green), Sox9 (red) and DAPI (blue) in WT striatum. In the upper right corner, a 40x magnification is shown for better visualization of the absence of co-localization between NeuN<sup>+</sup> and Sox9<sup>+</sup> nuclei. **e**, Bargraphs showing the number of nuclei per mm<sup>2</sup> as a mean  $\pm$  sem of NeuN<sup>+</sup> and Sox9<sup>+</sup> populations in WT (blue) and Q140 (orange) striatum at 2 months of age. Individual values are depicted as white circles. Data were analysed using two-way Anova; multiple comparisons used the Tukey's post-hoc test, \*\*\*\*,  $p < 0.0001$ , NeuN<sup>+</sup> vs Sox9<sup>+</sup> comparison. Source data are provided as a Source Data file.

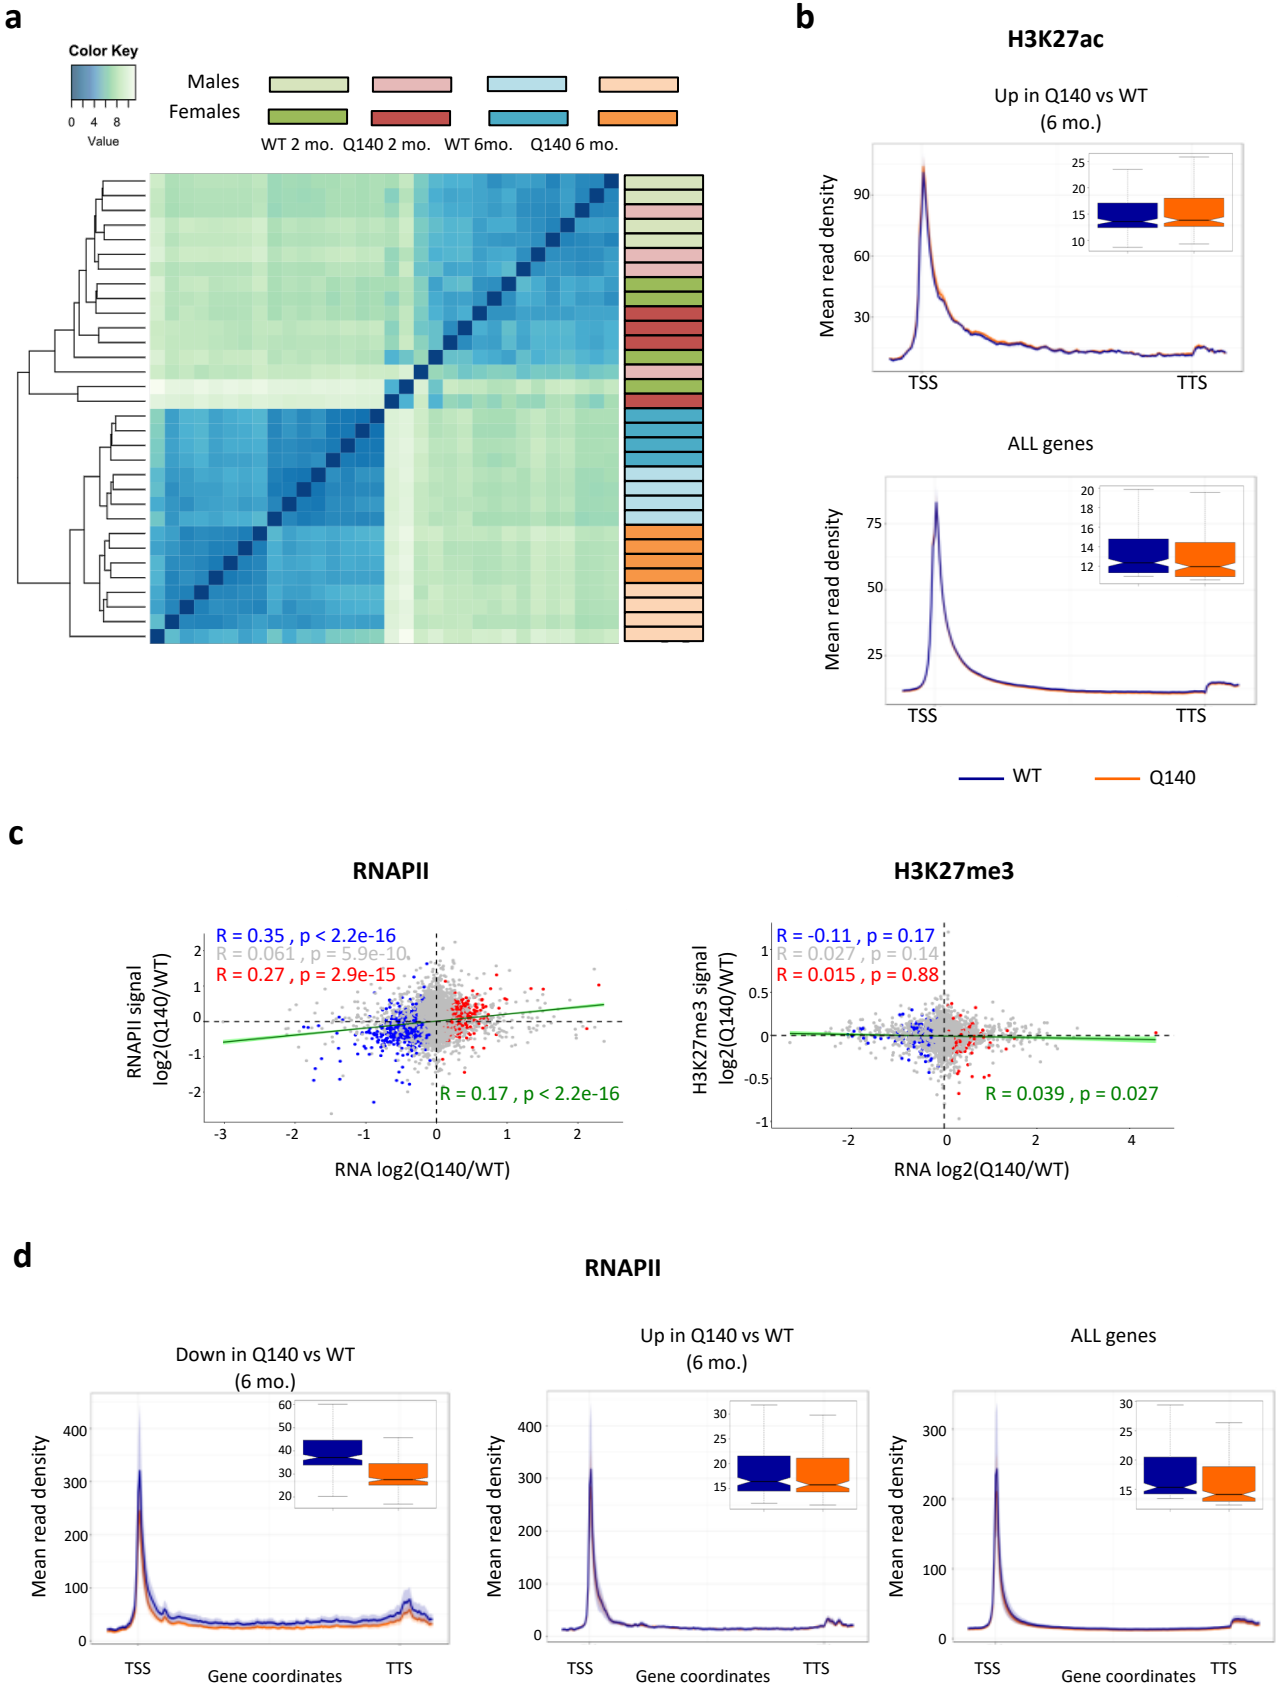

## Supplementary Fig. 9

### The HD mutation early affects epigenetic and transcriptional regulations in mouse striatum: complementary information and analyses

**a**, Heatmap showing hierarchical clustering of RNAseq striatal samples from Q140 mice at 2 and 6 months of age<sup>5</sup>. The heatmap was computed using UPGMA algorithm (Unweighted Pair Group Method with Arithmetic Mean) with the SERE coefficient as distance measure<sup>54</sup>. **b**, Gene body metaprofiles representing H3K27ac read count distribution for top 300 up-regulated genes in Q140 mouse striatum at 6 months and considering all genes (n= 36,873 refseq transcripts). TSS, Transcription Start Site; TTS, Transcription Termination Site. Data from male and female samples were used to generate average profile. Boxplots represent the distribution of mean read density along the profiles and show median, first quartile (Q1), third quartile (Q3) and range (min, Q1-1.5x(Q3-Q1); max, Q3+1.5x(Q3-Q1)). **c**, Linear regression analysis between transcriptional and RNAPII changes (left) and between transcriptional and H3K27me3 changes (right) in the striatum of Q140 vs WT mice of 6 months. The correlation is shown for all genes (green), genes significantly down-regulated (Fold change (*FC*)<1 and adj. *p* value <0.05; blue), genes significantly up-regulated (*FC*>1 and adj. *p* value <0.05; red) and non-significantly altered genes (grey). Pearson's correlation index and *p* value for fitted linear model are shown. **d**, Gene body metaprofiles representing RNAPII read count distribution for top 300 down-regulated, 300 up-regulated genes in Q140 mouse striatum at 6 months and considering all genes (n=36,873 refseq transcripts). TSS, Transcription Start Site; TTS, Transcription Termination Site. Data from male and female samples were used to generate average profile. Boxplots represent the distribution of mean read density along the profiles and show median, first quartile (Q1), third quartile (Q3) and range (min, Q1-1.5x(Q3-Q1); max, Q3+1.5x(Q3-Q1)). Source data are provided as a Source Data file.

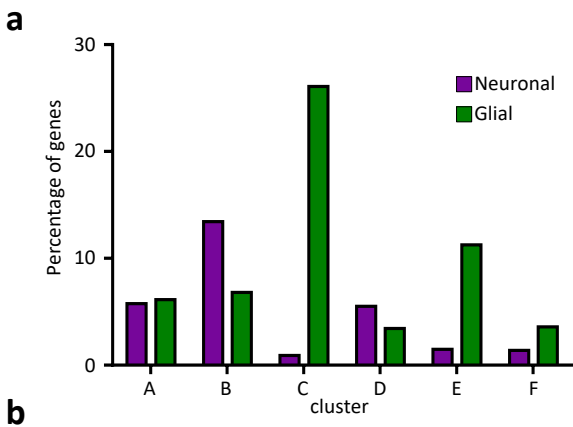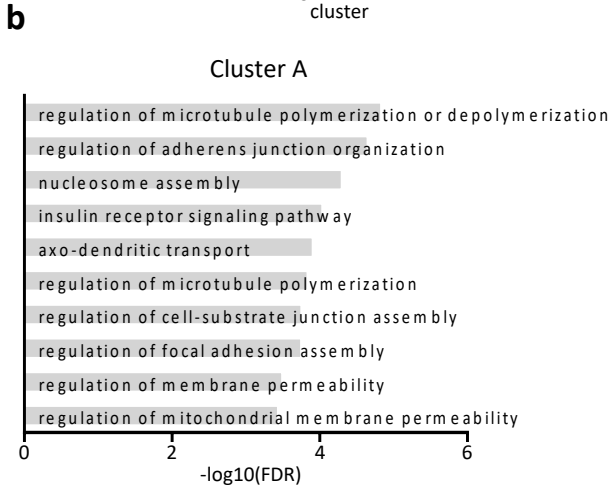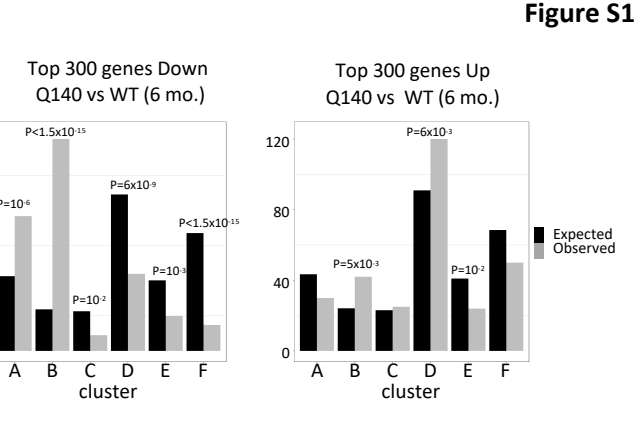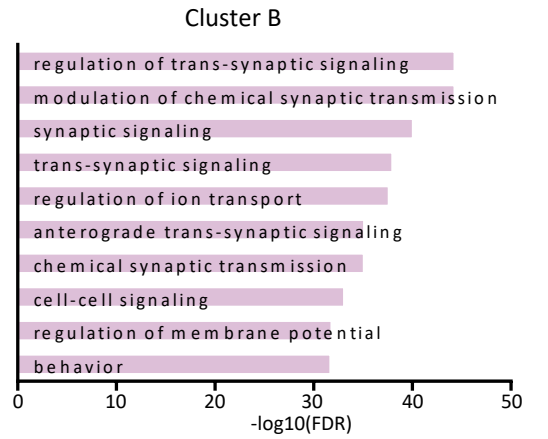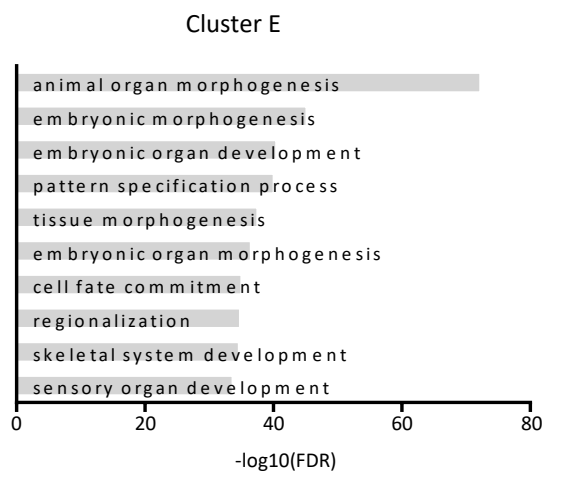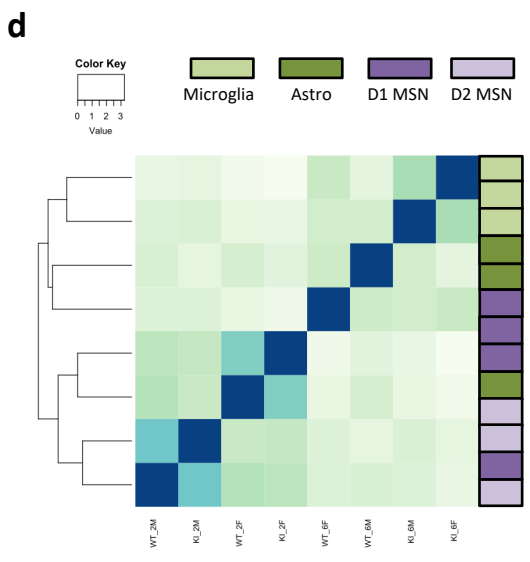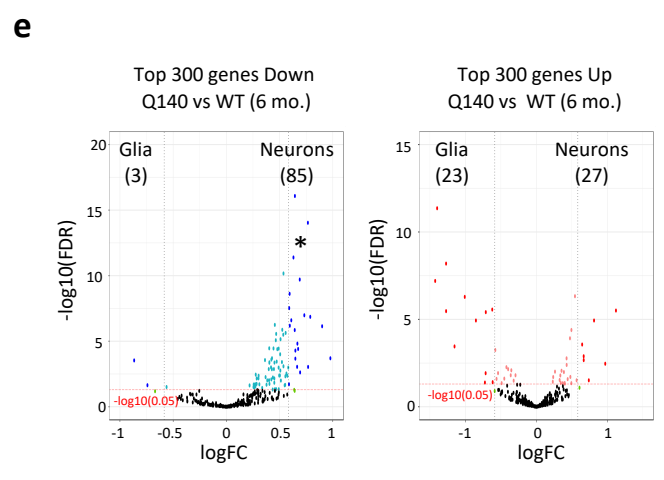



## Supplementary Fig. 10

### The HD mutation early affects epigenetic and transcriptional regulations of neuronal- and glial-specific genes in mouse striatum: complementary information and analyses

**a**, Histograms showing the percentage of neuronal-specific genes (purple) and glial-specific genes (green) in each cluster, as generated in Fig. 2c. As expected, cluster B (neuronal super enhancers) is enriched in neuronal-specific genes and cluster C (glial super enhancers) is enriched in glial-specific genes. **b**, Bar graphs showing enriched GO terms (Biological Process,  $-\log_{10}(\text{FDR}) < 0.05$ ) in cluster A, cluster B, cluster C and cluster E. **c**, Histograms showing cluster distribution of genes down- (upper panel) and up-regulated (lower panel) in Q140 vs WT striatum at 6 months of age. 300 top dysregulated genes were analysed from RNAseq data<sup>5</sup>. Observed numbers were compared with expected numbers and a binomial test was used to assess significant differences, with multiple testing correction using the Bonferroni method. **d**, Heatmap showing hierarchical clustering of RNAseq samples generated using different neuronal and glial cell populations of WT mouse striatum, including medium spiny neurons expressing dopamine D1 receptor (D1 MSN), medium spiny neurons expressing dopamine D2 receptor (D2 MSN), astrocytes (Astro) and microglia (Micro)<sup>8</sup>. The heatmap was computed using UPGMA algorithm (Unweighted Pair Group Method with Arithmetic Mean) with the SERE coefficient as distance measure **e**, Volcano plot representation of differential expression values between glial cells (astrocytes and microglia) and neurons (Medium Spiny Neurons, MSN, including D1 and D2 MSN) using genes down (left) and up (right) in Q140 vs WT striatum at 6 months. Genes down (upper panel)/up (lower panel) in Q140 vs WT striatum and significantly increased in neurons vs glial cells ( $FC > 1$  and adj.  $p$  value  $< 0.05$ ) are shown in blue; genes down (upper panel)/up (lower panel) in Q140 vs WT striatum and significantly decreased in neurons vs glial cells ( $FC < 1$  and adj.  $p$  value  $< 0.05$ ) are shown in red. A binomial test (two-sided) was performed to assess enrichment in neurons or glia; \*  $P < 2 \times 10^{-16}$ . Adjustment for multiple comparisons was not performed. RNAseq data were from<sup>5,10</sup>. Source data are provided as a Source Data file.

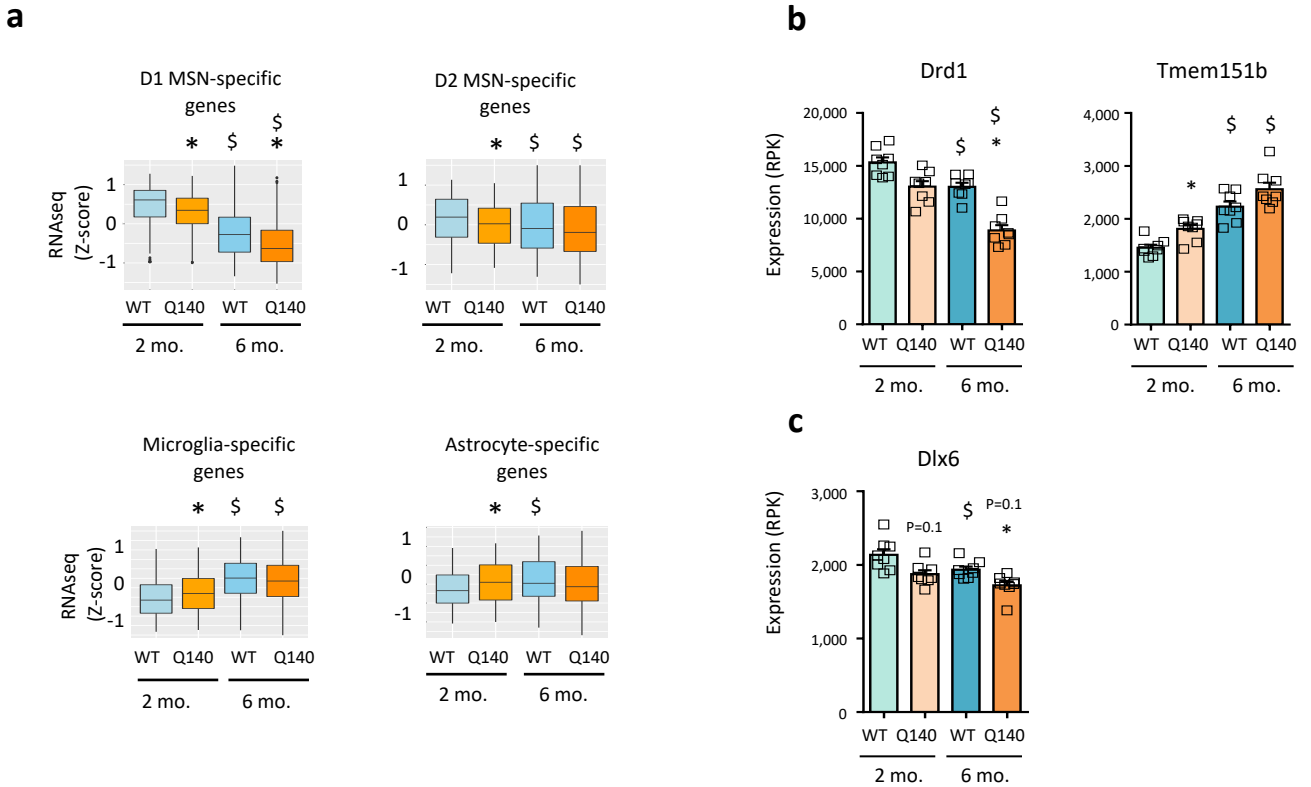

### Supplementary Fig. 11

#### Effect of the HD mutation on age-related transcriptional changes at cell type-specific striatal genes: complementary information and analyses

**a**, Boxplots representing z-score values computed from RNAseq data generated on Q140 and WT striatum at 2 months and 6 months for genes increased in D1 MSN (D1-specific genes; top left), genes increased in D2 MSN (D2-specific genes; top right), genes increased in microglia (microglia-specific genes; bottom left), genes increased in astrocytes (astro-specific genes; bottom middle) and considering all genes (bottom right). Boxplots show median, first quartile (Q1), third quartile (Q3) and range (min, Q1-1.5x(Q3-Q1); max, Q3+1.5x(Q3-Q1)). Statistical analysis was performed using Kruskal-Wallis test (one-sided), with multiple testing correction using the Benjamini-Hochberg method. D1 MSN-specific genes: \*,  $P < 2 \times 10^{-16}$ , Q140 vs WT comparison at 2 months; \*,  $P = 10^{-12}$ , Q140 vs WT comparison at 6 months; \$,  $P < 2 \times 10^{-16}$ , 6 vs 2 month comparison in WT; \$,  $P < 2 \times 10^{-16}$ , 6 vs 2 month comparison in R6/1. D2 MSN-specific genes: \*,  $P = 2 \times 10^{-8}$ , Q140 vs WT comparison at 2 months; \$,  $P = 3 \times 10^{-5}$ , 6 vs 2 month comparison in WT; \$,  $P = 2 \times 10^{-2}$ , 6 vs 2 month comparison in R6/1. Microglia-specific genes: \*,  $P = 3 \times 10^{-7}$ , Q140 vs WT comparison at 2 months; \$,  $P < 2 \times 10^{-16}$ , 6 vs 2 month comparison in WT; \$,  $P < 2 \times 10^{-16}$ , 6 vs 2 month comparison in R6/1. Astrocyte-specific genes: \*,  $P = 2 \times 10^{-5}$ , Q140 vs WT comparison at 2 months; \$,  $P = 9 \times 10^{-7}$ , 6 vs 2 month comparison in WT. RNAseq data from transcriptomic databases<sup>5,10</sup> were used for these analyses. **b,c**, Bar graphs showing mean (+/- sem) expression of *Drd1*, *Tmem151b* (c), and *Dlx6* (d) in WT and Q140 striatum at 2 and 6 months of age. Expression values were computed from re-analysis of RNAseq data from Q140 transcriptomic database<sup>5</sup>, using DESeq2 Bioconductor package. N=8 biological replicates per group. RPK, reads per kilobases. The Benjamini and Hochberg method was used for multiple testing correction. *Drd1*: \*, adj.  $p$  val =  $5 \times 10^{-10}$  Q140 vs WT at 6 months; \$, adj.  $p$  val =  $10^{-2}$  6 vs 2 months in WT; \$, adj.  $p$  val =  $3 \times 10^{-11}$  6 vs 2 months in Q140. *Tmem151b*: \*, adj.  $p$  val =  $3 \times 10^{-2}$  Q140 vs WT at 2 months; \$, adj.  $p$  val =  $3 \times 10^{-12}$  6 vs 2 months in WT; \$, adj.  $p$  val =  $2 \times 10^{-8}$  6 vs 2 months in Q140. *Dlx6*: adj.  $p$  val =  $10^{-1}$  Q140 vs WT at 2 months; \*, adj.  $p$  val =  $6 \times 10^{-3}$  Q140 vs WT at 6 months; \$, adj.  $p$  val =  $5 \times 10^{-2}$  6 vs 2 months in WT; adj.  $p$  val =  $10^{-1}$  6 vs 2 months in Q140. Source data are provided as a Source Data file.

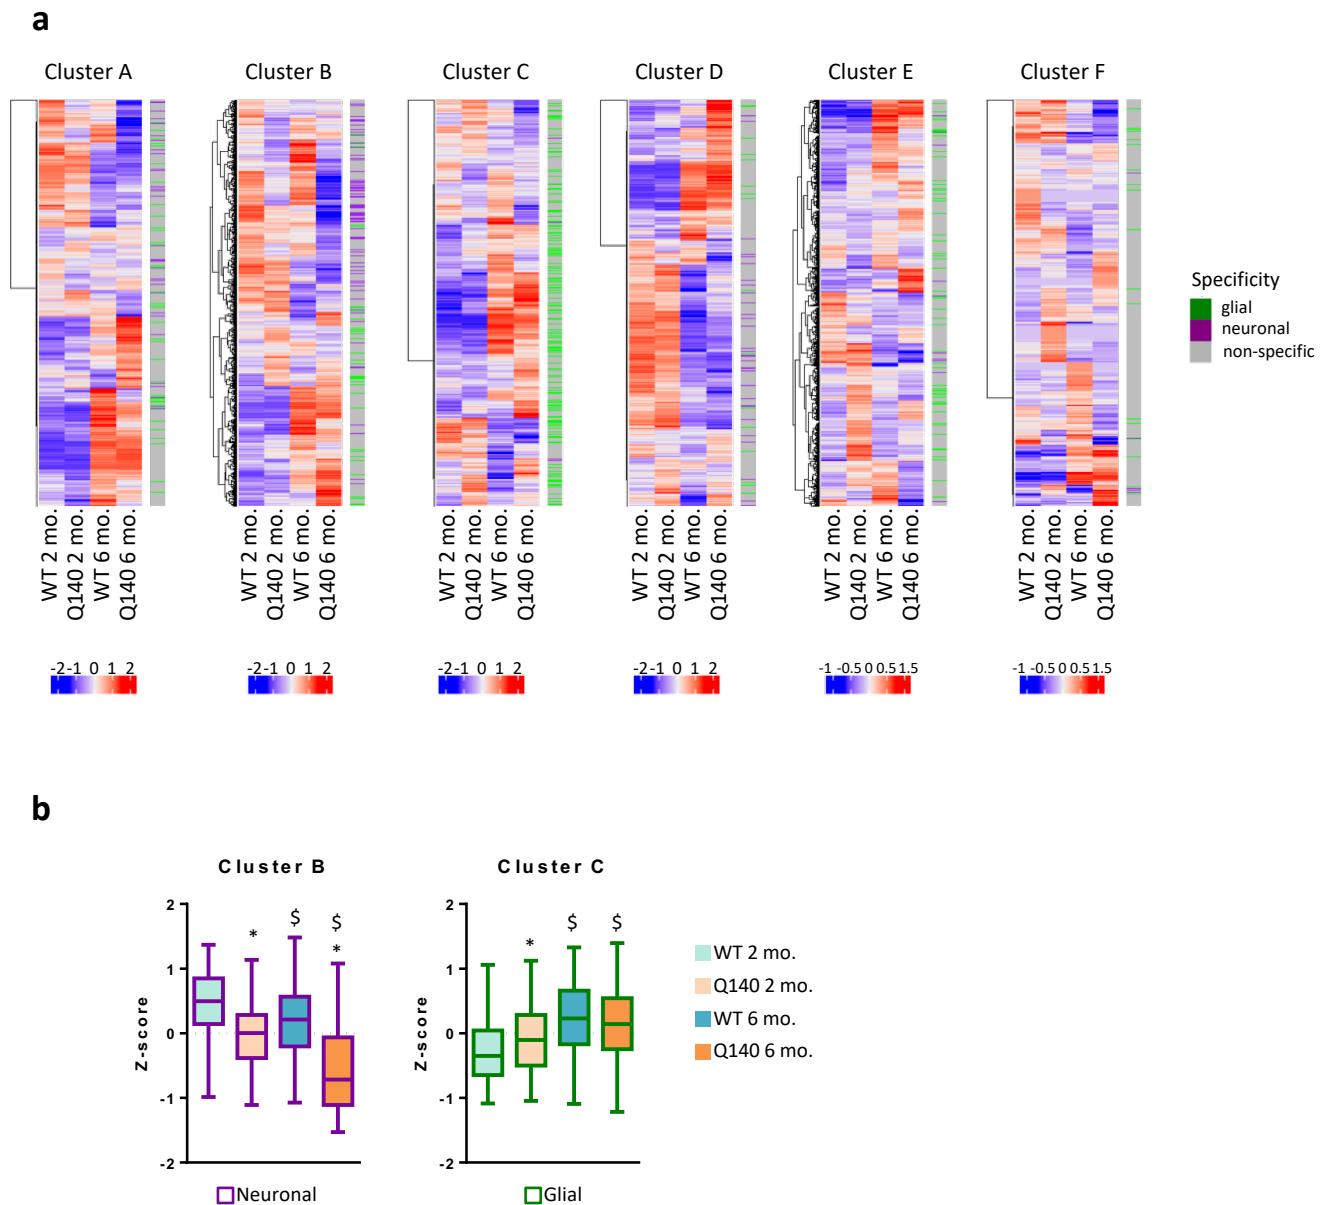

### Supplementary Fig. 12

#### Effect of the HD mutation on age-related transcriptional changes at epigenetically defined striatal identity genes: complementary information and analyses

**a**, Heatmap showing hierarchical clustering of expression values in WT and Q140 striatum at 2 and 6 months of genes within the different clusters defined in Fig. 2c, using cell type-specific H3K27ac and H3K27me3 ChIPseq data. Expression values correspond to mean z-scores and were computed from RNAseq data from transcriptomic database<sup>5</sup>. Additionally, genes in each cluster were intersected with cell-type specific striatal RNAseq data<sup>10</sup>. **b**, Boxplots representing z-score values computed from RNAseq data generated on Q140 and WT striatum at 2 months and 6 months, using genes in cluster B (neuronal identity genes, left; N= 235 genes ) and genes in cluster C (glial identity genes, right; N= 432 genes). Boxplots show median, first quartile (Q1), third quartile (Q3) and range (min, Q1-1.5x(Q3-Q1); max, Q3+1.5x(Q3-Q1)). Statistical analysis was performed using Kruskal-Wallis test (one-sided), with multiple testing correction using the Dunn's test. \*,  $P < 2 \times 10^{-4}$ , Q140 vs WT comparison; \$,  $P < 2 \times 10^{-4}$ , 6 vs 2 month comparison. RNAseq data from transcriptomic databases<sup>5,10</sup> were used for these analyses. The results show that down-regulation with age of neuronal identity genes in cluster B is accelerated in Q140 striatum when compared to WT striatum, whereas up-regulation of glial identity genes in cluster C with age is accelerated in Q140 striatum. Source data are provided as a Source Data file.

**a** Age-associated changes in WT and Q140

| PEAKS    | WT    |       | Q140  |       |
|----------|-------|-------|-------|-------|
|          | DOWN  | UP    | DOWN  | UP    |
| H3K27ac  | 1,126 | 1,190 | 2,316 | 1,218 |
| RNAPII   | 5,056 | 3,174 | 3,975 | 1,524 |
| H3K27me3 | 468   | 88    | 800   | 181   |

| GENES<br>(protein coding) | WT    |       | Q140  |       |
|---------------------------|-------|-------|-------|-------|
|                           | DOWN  | UP    | DOWN  | UP    |
| H3K27ac                   | 568   | 1,107 | 1,239 | 1,042 |
| RNAPII                    | 1,603 | 2,895 | 1,298 | 1,398 |
| H3K27me3                  | 367   | 72    | 609   | 122   |

**b**

RNAPII down / up with age

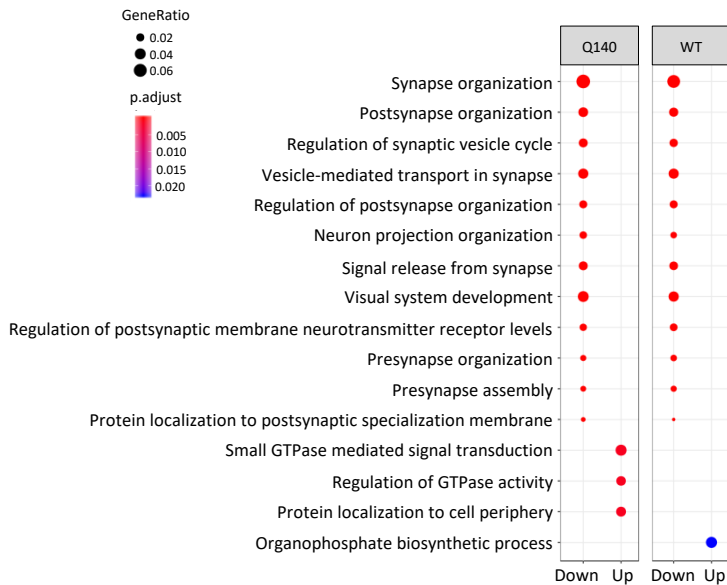

**c**

H3K27me3 down / up with age

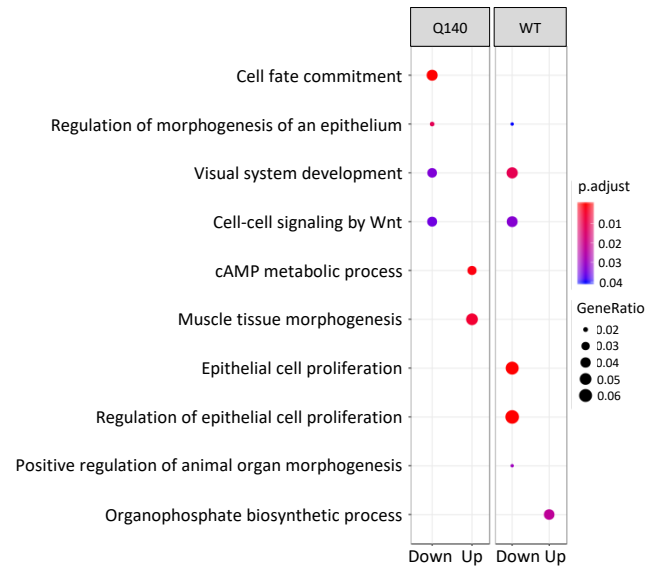

**Supplementary Fig. 13**

**The effect of the HD mutation on age-related epigenetic changes in mouse striatum: complementary information and analyses**

**a**, Summary table of regions showing differential enrichments in H3K27ac, H3K27me3 and RNAPII with age in Q140 or WT samples, processing male and female samples as replicates (adj. p value <0.05; Top). Summary table showing corresponding protein coding genes associated with differentially enriched regions in H3K27ac, H3K27me3 and RNAPII with age in Q140 and WT samples (Bottom). **b**, Gene Ontology analysis of regions differentially enriched in RNAPII in 6 vs 2 month striatal samples, in Q140 and WT contexts (FDR <0.05). Significant biological processes are shown using dot size proportional to gene ratio and heatmap reflecting adj. p value. **c**, Gene Ontology analysis of regions differentially enriched in H3K27me3 in 6 vs 2 month striatal samples, in Q140 and WT contexts (FDR <0.05). Significant biological processes are shown using dot size proportional to gene ratio and heatmap reflecting adj. p value. Source data are provided as a Source Data file.

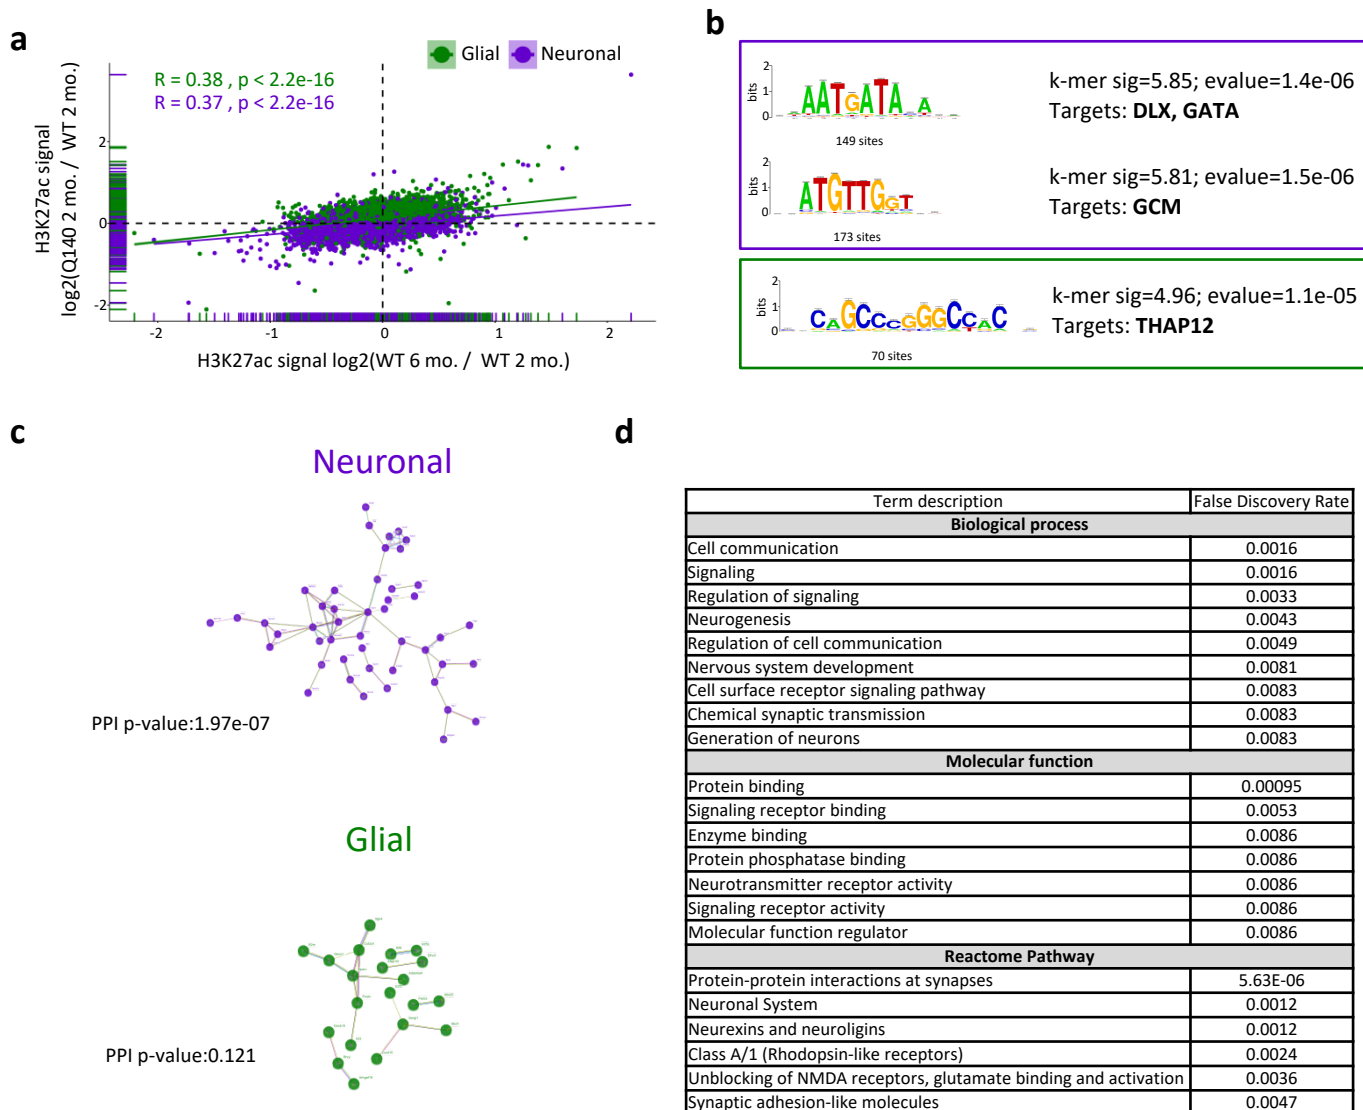

### Supplementary Fig. 14

#### The effect of the HD mutation on age-related epigenetic changes in mouse striatum: complementary information and analyses.

**a**, Scatter plot showing genotype-dependent variation in H3K27ac as a function of age-dependent variation in H3K27ac, at all neuronal- and glial-specific striatal enhancers. Log<sub>2</sub> of fold change in H3K27ac levels between Q140 and WT samples at 2 months (log<sub>2</sub>(Q1402/WT2)) are shown on y axis, log<sub>2</sub> of fold change in H3K27ac levels between WT samples at 6 vs 2 months (log<sub>2</sub>(WT6/WT2)) are shown on x axis. Spearman linear correlation was calculated for neuronal (purple) and glial (green) specific H3K27ac enriched regions, with correlation coefficient and p value shown for each cellular population. <0.05) shown in red. A binomial test was performed to assess enrichment in neurons or glia; \* P < 10<sup>-2</sup>. **b**, Results of DNA motif analysis, using differentially enriched H3K27ac regions both in Q140 vs WT samples at 2 months and in WT samples at 6 vs 2 months. Significantly enriched motifs are shown with corresponding statistics. **c**, STRING network representations of proteins encoded by genes close to differentially enriched H3K27ac regions (p <0.05) both in Q140 vs WT samples at 2 months and in WT samples at 6 vs 2 months. On top, the protein network was built using proteins encoded by genes associated with neuronal-specific H3K27ac-enriched regions (neuronal-specific enhancers, purple), on the bottom, the protein network was built using proteins encoded by genes associated with glial-specific H3K27ac-enriched regions (glial-specific enhancers, green). Protein-protein Interaction p values reflecting network complexity are shown in each case. **d**, Summary table of STRING Gene Ontology network analysis using genes associated to neuronal-specific H3K27ac-enriched regions (neuronal-specific enhancers) showing H3K27ac depletion in both genotype- and age-dependent manners. GO terms (including Biological Process, Molecular Function and Reactome Pathway) with FDR < 0.01 are shown. Source data are provided as a Source Data file.

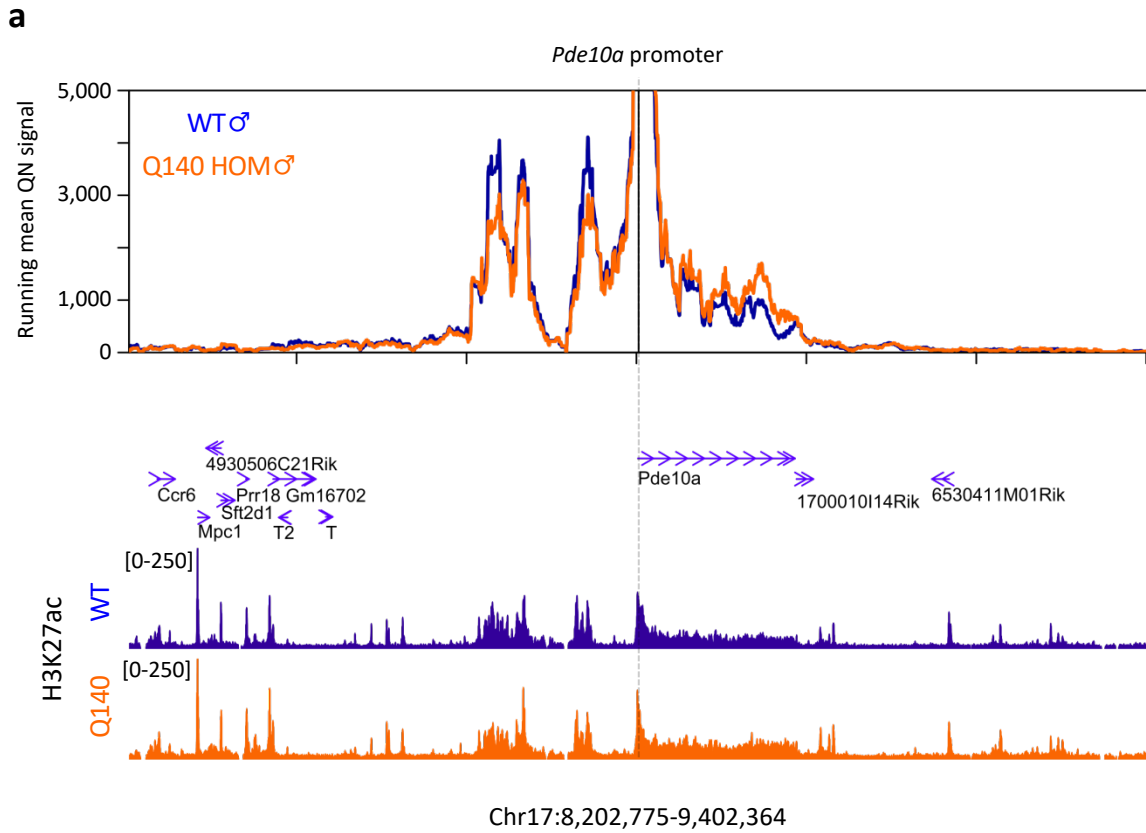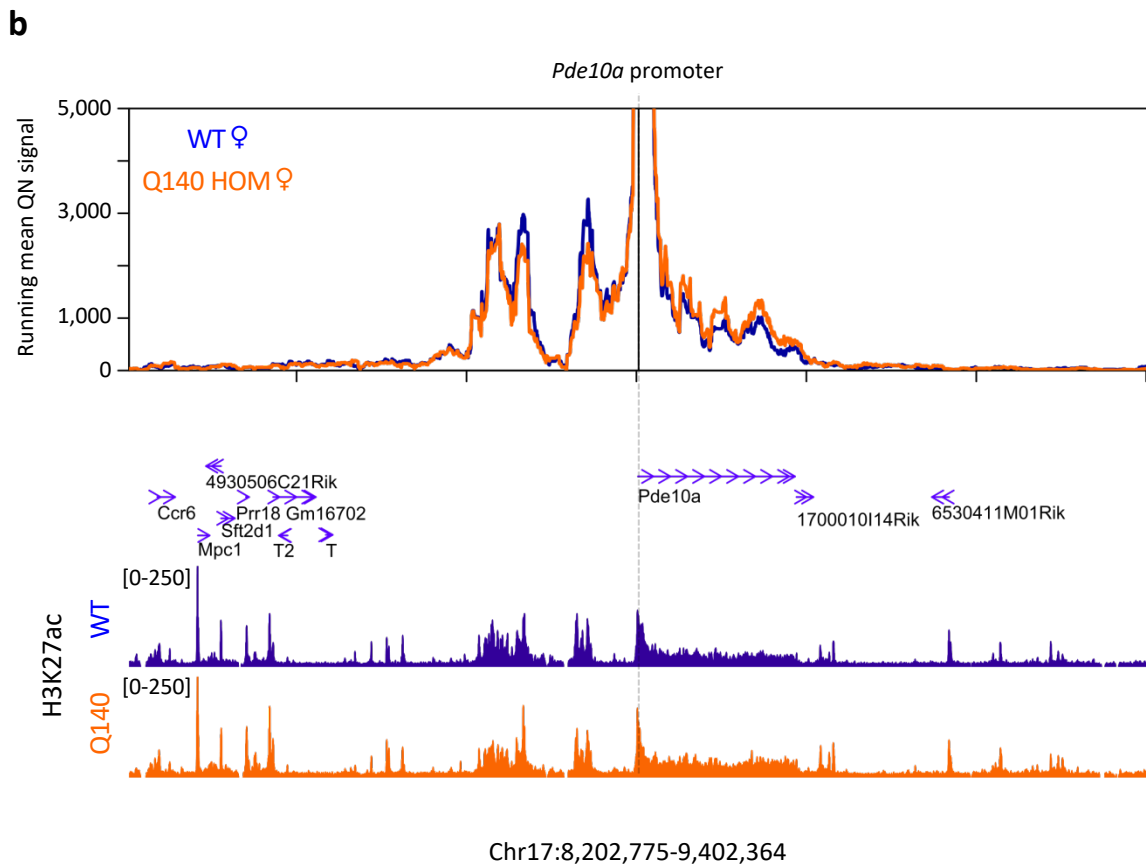

**Supplementary Fig. 15**

**3D chromatin architecture at *Pde10a* gene in the striatum of male and female HD Q140 mice**

4C-seq profiles at *Pde10a* loci from Q140 (orange) and WT (blue) male (a) and female (b) mice striatum at 6 months of age. Gene annotations are included as well as H3K27ac ChIP-seq signals (using ChIP-seq data generated in this study on the striatum of Q140 and WT mice at same age).

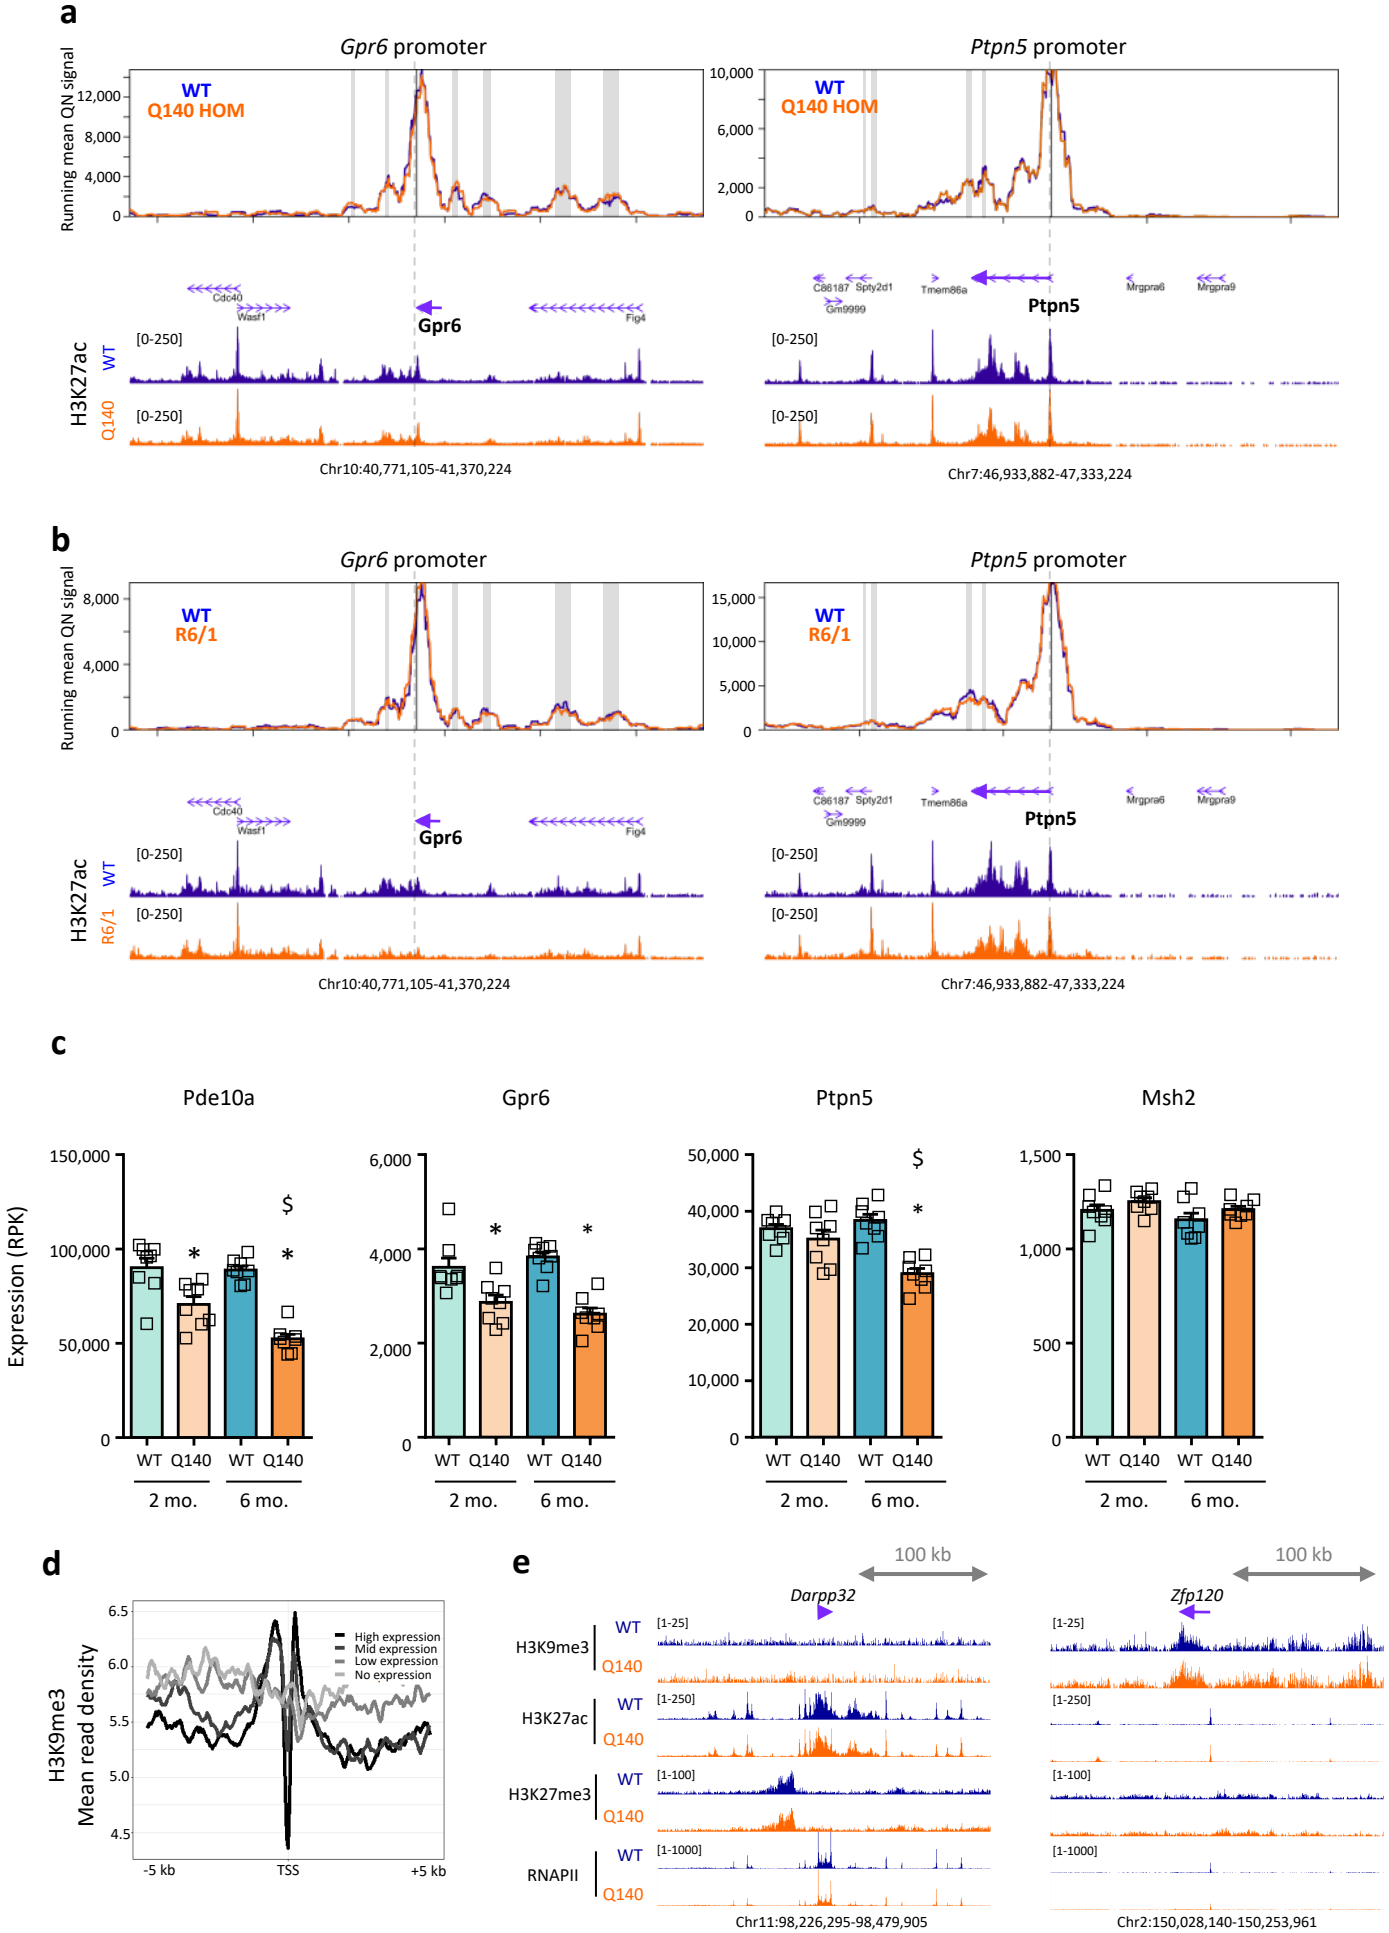

## Supplementary Fig. 16

### 3D chromatin architecture at super-enhancer regulated genes in the striatum of HD Q140 mice: complementary information and analyses

**a**, 4C-seq profiles at *Gpr6* and *Ptpn5* loci from Q140 (orange) and WT (blue) striatum at 6 months of age. The mean of male and female 4C-seq quartile normalized read counts is plotted as the main lane for each condition. Gene annotations are included as well as H3K27ac ChIPseq signals (using ChIPseq data generated in this study on the striatum of Q140 and WT mice at same age). Grey shadows show specific interacting regions. **b**, 4C-seq profiles at *Gpr6* and *Ptpn5* loci from R6/1 (orange) and WT (blue) striatum at 14 weeks of age. Gene annotations and H3K27ac ChIPseq signals<sup>3</sup> are included. Grey shadow show specific interacting regions. **c**, Bar graphs showing expression of *Pde10a*, *Gpr6*, *Ptpn5* and *Msh2* in WT and Q140 striatum at 2 and 6 months of age. Expression values were computed from RNAseq data generated in Q140 mice<sup>5</sup>, using DESeq2 Bioconductor package. N= 8 biological replicates per group. RPK, reads per kilobases. The Benjamini and Hochberg method was used for multiple testing correction. *Pde10a*: \*, adj. *p* val =  $4 \times 10^{-2}$  Q140 vs WT at 2 months; \*, adj. *p* val =  $2 \times 10^{-13}$  Q140 vs WT at 6 months; \$, adj. *p* val =  $3 \times 10^{-5}$  6 vs 2 months in Q140. *Gpr6*: \*, adj. *p* val =  $4 \times 10^{-2}$  Q140 vs WT at 2 months; \*, adj. *p* val =  $2 \times 10^{-7}$  Q140 vs WT at 6 months; *Ptpn5*: \*, adj. *p* val =  $9 \times 10^{-8}$  Q140 vs WT at 6 months; \$, adj. *p* val =  $2 \times 10^{-4}$  6 vs 2 months in Q140s **d**, Representative gene metaprofiles for H3K9me3 at no-, low-, mid- and high-expressed genes in the striatum. No-, low-, mid- and high-expressed genes were delineated according to quartile distribution of normalized striatal RNAseq values (i.e. no-expressed < 1<sup>st</sup>, 1<sup>st</sup> < low-expressed < 2<sup>nd</sup>, 2<sup>nd</sup> < mid-expressed < 3<sup>rd</sup>, high-expressed > 4<sup>th</sup> quartiles). H3K9me3 ChIPseq data and RNAseq data generated on WT striatum at 6 months were used in the analysis. TSS, Transcription Start Site. **e**, UCSC genome browser capture showing representative H3K9me3, H3K27ac, H3K27me3 and RNAPII signal in the striatum of WT and Q140 mouse striatum at 6 months at selected loci, including euchromatinized region (*Darpp32* locus) and heterochromatinized region (*Zfp120* gene in chromosome 2). Source data are provided as a Source Data file.





### Supplementary Fig. 17

#### The HD mutation induces disease locus-specific alterations of 3D chromatin architecture and transcription regulation in the striatum of Q140 mice

**a**, Summary table of Pearson's correlation coefficients, comparing the different vHi-C models encompassing *Htt*, and generated using 4Cseq data on WT and Q140 samples (N=2, 1 ♂ + 1 ♀). **b**, Representative 3D models at the region encompassing *Htt*, in WT and Q140 striatum. Chromatin painting was performed using H3K27ac (green), H3K27me3 (red) and RNAPII (blue) ChIP-seq data on the striatum of WT or Q140 mice at 6 months. Viewpoints are depicted with a red label and names are indicated to improve visualization of 3D chromatin architecture. **c**, Dot plots showing expression of genes located in the two-megabase region reconstructed by vHi-C according to their spatial proximity (Armstrongs, Å) to previously identified peak in H3K27ac, H3K27me3 and RNAPII ChIP-seq data generated on WT and Q140 striatum (using ♀ data). **d**, Manhattan plot representing the distribution of differentially expressed genes (DEG) in R6/1 vs WT striatum at 6 months across the different chromosomes. Significant DEG (adj. *p* value <0.01) are labelled as red dots and the percentage of DEG within each chromosome is shown in peripheral arc. RNAseq data were analysed using R6/1 transcriptomic database and DESeq2 Bioconductor package<sup>3</sup>. **e**, UCSC genome browser capture showing *Grk4* and *Htt* genes. **f**, Bar graphs showing mRNA levels of *Htt* and *Grk4* in the striatum of 6 month-old HD KI mice expressing *Htt* with 175 CAG (Q175), 140 CAG (Q140), 20 CAG (Q20) and in the striatum of WT mice. RNAseq data were analysed using transcriptomic database and DESeq2 Bioconductor package<sup>5</sup>. N= 8 biological replicates per group. Expression levels are represented as percentage of WT values. The Benjamini and Hochberg method was used for multiple testing correction. *Htt*: \*, adj. *p* val =  $6 \times 10^{-7}$  Q140 vs WT ; \*, adj. *p* val =  $10^{-33}$  Q175 vs WT. *Grk4*: \*, adj. *p* val =  $10^{-7}$  Q140 vs WT ; \*, adj. *p* val =  $10^{-12}$  Q175 vs WT (top). Bargraphs showing mRNA levels of *Htt* and *Grk4* in the striatum of 6 month-old R6/1 and WT mice. RNAseq data were analysed using R6/1 transcriptomic database (GSE59572; <https://www.ncbi.nlm.nih.gov/geo/query/acc.cgi?acc=GSE59572>) and DESeq2 Bioconductor package<sup>3</sup>. N= 3 and 2 biological replicates for WT and R6/1 samples, respectively. Expression levels are represented as percentage of WT values. The Benjamini and Hochberg method was used for multiple testing correction (bottom). Source data are provided as a Source Data file.

|                           |                            |
|---------------------------|----------------------------|
| Pde10a 4C-seq reading     | CGTCAGGAATCCAGCGGTTTAGATC  |
| Pde10a 4C-seq non-reading | GTGCGCACCGAGCCTTTG         |
| Gpr6 4C-seq reading       | CCAGCAAGAAGGGCAGAGATC      |
| Gpr6 4C-seq non-reading   | GCACGGGTTTTATTTTCAGCCC     |
| Htt 4C-seq reading        | GGCTTCGGGGTCCACG           |
| Htt 4C-seq non-reading    | CCGGGCATGGTGGTGCA          |
| Dclk3 4C-seq reading      | GGCAGGAGACTCAGCATCTGATC    |
| Dclk3 4C-seq non-reading  | GCCCACAGATTTTTGCAGAGG      |
| Ptpn5 4C-seq reading      | TCCTGGTGCGCTTTTCAAAGGATC   |
| Ptpn5 4C-seq non-reading  | CTTCCTTTCTCCCGTTACCTCTT    |
| Msh2 4C-seq reading       | GTGGGGGAGAGGTTATTATGGTGATC |
| Msh2 4C-seq non-reading   | TGGTTGACCTGGAAGTCTAGGTTT   |
| Acox3 4C-seq reading      | GCTCTGTGGGCTTTGTTTGTGATC   |
| Acox3 4C-seq non-reading  | GCCCTAGTTTTGGTCTGAAGTCTAT  |
| Mxd4 4C-seq reading       | TCCTGGCTGCAGTGGGATC        |
| Mxd4 4C-seq non-reading   | GTGCAAGGGAGGGAGGAGTC       |
| Nop14 4C-seq reading      | GCCTTAAACTAGCCAGCAAACGATC  |
| Nop14 4C-seq non-reading  | CAGCACCCCTCATGACTTCTACA    |
| Lrpap1 4C-seq reading     | TGGGGTGGGCGGGATC           |
| Lrpap1 4C-seq non-reading | CCTAGTCTCTGCACCTGCAGC      |

**Supplementary Table 1**  
**List of primers used for 4Cseq experiments**
