# Supplementary material for: Age-related and disease locus-specific mechanisms contribute to early remodelling of chromatin structure in Huntington’s disease mice
Source: PubMed Central journal article supplement (PMC7807045; doi:10.1038/s41467-020-20605-2), 2021-01-13
Supplement: 41467_2020_20605_MOESM3_ESM.pdf [file 41467_2020_20605_MOESM3_ESM.pdf]

## **Description of Additional Supplementary Files**

**Supplementary Data 1:** Regions identified as neuronal-, glial- and non-specific from mouse striatal ChIPseq data

**Supplementary Data 2:** Interacting regions identified in 4Cseq data experiments in WT and Q140 striatum

**Supplementary Movie 1:** Three-dimensional model reconstruction of Htt vHi-C data using WT mouse striatum (using female sample) and superposing with H3K27ac, H3K27me3 and RNAPII signals of striatal ChIPseq data

**Supplementary Movie 2:** Three-dimensional model reconstruction of Htt vHi-C data using Q140 mouse striatum (using female sample) and superposing with H3K27ac, H3K27me3 and RNAPII signals of striatal ChIPseq data
