# Supplementary material for: Age-related and disease locus-specific mechanisms contribute to early remodelling of chromatin structure in Huntington’s disease mice
Source: PubMed Central journal article supplement (PMC7807045; doi:10.1038/s41467-020-20605-2), 2021-01-13
Supplement: 41467_2020_20605_MOESM8_ESM.pdf [file 41467_2020_20605_MOESM8_ESM.pdf]

## Reporting Summary

Nature Research wishes to improve the reproducibility of the work that we publish. This form provides structure for consistency and transparency in reporting. For further information on Nature Research policies, see [Authors & Referees](#) and the [Editorial Policy Checklist](#).

### Statistics

For all statistical analyses, confirm that the following items are present in the figure legend, table legend, main text, or Methods section.

n/a Confirmed

- |                                     |                                     |                                                                                                                                                                                                                                                            |
|-------------------------------------|-------------------------------------|------------------------------------------------------------------------------------------------------------------------------------------------------------------------------------------------------------------------------------------------------------|
| <input type="checkbox"/>            | <input checked="" type="checkbox"/> | The exact sample size ( $n$ ) for each experimental group/condition, given as a discrete number and unit of measurement                                                                                                                                    |
| <input type="checkbox"/>            | <input checked="" type="checkbox"/> | A statement on whether measurements were taken from distinct samples or whether the same sample was measured repeatedly                                                                                                                                    |
| <input type="checkbox"/>            | <input checked="" type="checkbox"/> | The statistical test(s) used AND whether they are one- or two-sided<br><i>Only common tests should be described solely by name; describe more complex techniques in the Methods section.</i>                                                               |
| <input checked="" type="checkbox"/> | <input type="checkbox"/>            | A description of all covariates tested                                                                                                                                                                                                                     |
| <input type="checkbox"/>            | <input checked="" type="checkbox"/> | A description of any assumptions or corrections, such as tests of normality and adjustment for multiple comparisons                                                                                                                                        |
| <input type="checkbox"/>            | <input checked="" type="checkbox"/> | A full description of the statistical parameters including central tendency (e.g. means) or other basic estimates (e.g. regression coefficient) AND variation (e.g. standard deviation) or associated estimates of uncertainty (e.g. confidence intervals) |
| <input type="checkbox"/>            | <input checked="" type="checkbox"/> | For null hypothesis testing, the test statistic (e.g. $F$ , $t$ , $r$ ) with confidence intervals, effect sizes, degrees of freedom and $P$ value noted<br><i>Give <math>P</math> values as exact values whenever suitable.</i>                            |
| <input checked="" type="checkbox"/> | <input type="checkbox"/>            | For Bayesian analysis, information on the choice of priors and Markov chain Monte Carlo settings                                                                                                                                                           |
| <input checked="" type="checkbox"/> | <input type="checkbox"/>            | For hierarchical and complex designs, identification of the appropriate level for tests and full reporting of outcomes                                                                                                                                     |
| <input type="checkbox"/>            | <input checked="" type="checkbox"/> | Estimates of effect sizes (e.g. Cohen's $d$ , Pearson's $r$ ), indicating how they were calculated                                                                                                                                                         |

*Our web collection on [statistics for biologists](#) contains articles on many of the points above.*

### Software and code

Policy information about [availability of computer code](#)

|                 |                                                                                                                                                                                                                                                                                                                                                                                                                                                                                        |
|-----------------|----------------------------------------------------------------------------------------------------------------------------------------------------------------------------------------------------------------------------------------------------------------------------------------------------------------------------------------------------------------------------------------------------------------------------------------------------------------------------------------|
| Data collection | Equipment software of FACS Aria Fusion and FACS Aria II BD FACSDiva v8 and Illumina Hiseq 4000                                                                                                                                                                                                                                                                                                                                                                                         |
| Data analysis   | Sabre, Bowtie (v.1.0.0.), Sicer (v1.1.), Homer Annotate Peaks (v4.9.1), SeqMiner (1.3.4), RSAT peak-motifs, 4cin, 4see, DESeq2(v.1.14), Tophat2, HTSeq (v0.6.1p1), Microsoft Excel 2010, R (v.3.3.2), fastqc (v.0.11.5.), RTA (v.2.7.3), bcl2fastq (v.2.17.1.14.), Snagene (v1.1.3), STRING (v.11.0), peakC, UCSC genome browser, Clustvis 2.0, NDP.view v2, Icy, GREAT (v4.0.4), BEDTools (v2.28), Rstudio (v.1.1.456) and R packages: CMplot, ggpubR, Bioconductor, Clusterprofiler. |

For manuscripts utilizing custom algorithms or software that are central to the research but not yet described in published literature, software must be made available to editors/reviewers. We strongly encourage code deposition in a community repository (e.g. GitHub). See the Nature Research [guidelines for submitting code & software](#) for further information.

### Data

Policy information about [availability of data](#)

All manuscripts must include a [data availability statement](#). This statement should provide the following information, where applicable:

- Accession codes, unique identifiers, or web links for publicly available datasets
- A list of figures that have associated raw data
- A description of any restrictions on data availability

ChIPseq and 4Cseq have been deposited at Gene Expression Omnibus repository (GSE144684 [<https://www.ncbi.nlm.nih.gov/geo/query/acc.cgi?acc=GSE144684>] and GSE144699 [<https://www.ncbi.nlm.nih.gov/geo/query/acc.cgi?acc=GSE144699>], respectively)

## Field-specific reporting

Please select the one below that is the best fit for your research. If you are not sure, read the appropriate sections before making your selection.

- Life sciences       Behavioural & social sciences       Ecological, evolutionary & environmental sciences

For a reference copy of the document with all sections, see [nature.com/documents/nr-reporting-summary-flat.pdf](https://www.nature.com/documents/nr-reporting-summary-flat.pdf)

## Life sciences study design

All studies must disclose on these points even when the disclosure is negative.

|                 |                                                                                                                                                                                                                                                                                                                                                                                                                                                                                                   |
|-----------------|---------------------------------------------------------------------------------------------------------------------------------------------------------------------------------------------------------------------------------------------------------------------------------------------------------------------------------------------------------------------------------------------------------------------------------------------------------------------------------------------------|
| Sample size     | No statistical methods were used to predetermine sample sizes in ChIPseq and 4Cseq experiments, but our sample sizes were similar to those reported in similar studies (Vashishtha et al. 2013; Achour et al. 2015; Chatterjee et al. 2018). For behavioral analyses, sample sizes were chosen based on previous studies using similar experimental designs (Stefanko et al. 2017; Galvan et al. 2018).                                                                                           |
| Data exclusions | No data were excluded from the analysis                                                                                                                                                                                                                                                                                                                                                                                                                                                           |
| Replication     | All ChIPseq and 4Cseq data were replicated. PCA, correlative heatmaps and scatter plot analyses were used to assess data reproducibility. All attempts at replication were successful. Behavioral experiments were not replicated.                                                                                                                                                                                                                                                                |
| Randomization   | For ChIPseq and 4Cseq experiments using pooled mouse striatal tissues, male and female tissues were processed independently. One replicate was generated using males tissues, and the other replicate using female samples. For behavioral analyses, HD and WT animals were randomized.                                                                                                                                                                                                           |
| Blinding        | Blinding could not be applied to epigenomic studies, because samples had to be controlled by condition and the individual implicated in the production of next generation sequencing data was also implicated in data analysis. Behavioral experiments were performed blind by two experimentators. FANS and immunostaining analyses were conducted blindly to experimenter, using an automated software analysis with identical parameters along the different biological replicates and groups. |

## Reporting for specific materials, systems and methods

We require information from authors about some types of materials, experimental systems and methods used in many studies. Here, indicate whether each material, system or method listed is relevant to your study. If you are not sure if a list item applies to your research, read the appropriate section before selecting a response.

### Materials & experimental systems

| n/a                                 | Involvement in the study                                        |
|-------------------------------------|-----------------------------------------------------------------|
| <input type="checkbox"/>            | <input checked="" type="checkbox"/> Antibodies                  |
| <input checked="" type="checkbox"/> | <input type="checkbox"/> Eukaryotic cell lines                  |
| <input checked="" type="checkbox"/> | <input type="checkbox"/> Palaeontology                          |
| <input type="checkbox"/>            | <input checked="" type="checkbox"/> Animals and other organisms |
| <input checked="" type="checkbox"/> | <input type="checkbox"/> Human research participants            |
| <input checked="" type="checkbox"/> | <input type="checkbox"/> Clinical data                          |

### Methods

| n/a                                 | Involvement in the study                           |
|-------------------------------------|----------------------------------------------------|
| <input type="checkbox"/>            | <input checked="" type="checkbox"/> ChIP-seq       |
| <input type="checkbox"/>            | <input checked="" type="checkbox"/> Flow cytometry |
| <input checked="" type="checkbox"/> | <input type="checkbox"/> MRI-based neuroimaging    |

## Antibodies

### Antibodies used

Rabbit polyclonal anti-Histone H3 (acetyl K27) - ChIP Grade, Abcam, Cat# ab4729, RRID:AB\_2118291  
 H3K27me3 rabbit polyclonal antibody ChIP-seq grade, Diagenode, Cat# C15410195, RRID:AB\_2753161  
 7C2 RNA Polymerase II antibody Besse et al. 1995 (Home made, IGBMC Strasbourg)  
 Anti-Histone H3 (try methyl K9) antibody - ChIP Grade, Abcam, Cat# ab8898, RRID:AB\_306848  
 Anti-NeuN, clone A60 mouse monoclonal antibody, Millipore, Cat# MAB377, RRID:AB\_2298772  
 Donkey anti-Mouse IgG (H+L) Highly Cross-Adsorbed Secondary Antibody, Alexa Fluor 488, Invitrogen, Cat# A-21202, RRID:AB\_141607  
 Donkey anti-Rabbit IgG (H+L) Highly Cross-Adsorbed Secondary Antibody, Alexa Fluor 594, Invitrogen, Cat# A-21207, RRID:AB\_141637  
 Sox9 (D8G8H) Rabbit mAb #82630, Cell Signaling, Cat# 82630S, RRID:AB\_2665492  
 RBFOX3/NeuN Antibody (1B7) [Alexa Fluor® 405], Novus Biologicals, Cat# NBP1-92693AF405

## Validation

H3K27ac, H3K27me3, H3K9me3 and RNAPII antibodies used in ChIPseq experiments are ChIPseq grade and were used in mice for same application in previous studies (Fukuda et al. 2014; Achour et al., 2015; von Schimmelmann et al. 2016; Palmisano et al. 2019).

The NeuN antibody was used in FANS-based experiments using mouse brain tissues in previous studies (Halder et al. 2015; von Schimmelmann et al. 2016; Fernandez-Albert et al. 2019)

## Animals and other organisms

Policy information about [studies involving animals](#); [ARRIVE guidelines](#) recommended for reporting animal research

## Laboratory animals

HD Q140 knockin mice (140Chdij), C57BL/6J, males and females, 2 and 6 months of age.  
 HD R6/1 mice (6 N/A B6.Cg-Tg(HDexon1)61Gpb/J), C57BL/6J, males, 3 months of age.  
 Mice were housed in a controlled-temperature room maintained on a 12h light/dark cycle. Food and water were available ad libidum.

## Wild animals

The study did not involve wild animals.

## Field-collected samples

The study did not involve samples collected from the field.

## Ethics oversight

All animal procedures were approved by local ethics committee (CREMEAS) and French Research Ministry (no. APAFIS#4301-2016022912385206v2 and no. APAFIS#504-2015042011568820\_v3)

Note that full information on the approval of the study protocol must also be provided in the manuscript.

## ChIP-seq

## Data deposition

- Confirm that both raw and final processed data have been deposited in a public database such as [GEO](#).
- Confirm that you have deposited or provided access to graph files (e.g. BED files) for the called peaks.

## Data access links

*May remain private before publication.*

ChIPseq and 4Cseq data have been deposited at Gene Expression Omnibus repository (GSE144684 [<https://www.ncbi.nlm.nih.gov/geo/query/acc.cgi?acc=GSE144684>] and GSE144699 [<https://www.ncbi.nlm.nih.gov/geo/query/acc.cgi?acc=GSE144699>], respectively)

## Files in database submission

input\_WT\_6m\_M\_rep3.fastq.gz  
 input\_Q140\_6m\_M\_rep3.fastq.gz  
 H3K9me3\_WT\_6m\_M\_rep3.fastq.gz  
 H3K27me3\_WT\_6m\_M\_rep3.fastq.gz  
 H3K9me3\_Q140\_6m\_M\_rep3.fastq.gz  
 H3K27me3\_Q140\_6m\_M\_rep3.fastq.gz  
 input\_WT\_6m\_F\_rep4.fastq.gz  
 input\_Q140\_6m\_F\_rep4.fastq.g  
 H3K27ac\_WT\_6m\_F\_rep4.fastq.gz  
 H3K27me3\_WT\_6m\_F\_rep4.fastq.gz  
 RNAPII\_WT\_6m\_F\_rep4.fastq.gz  
 H3K27ac\_Q140\_6m\_F\_rep4.fastq.gz  
 H3K27me3\_Q140\_6m\_F\_rep4.fastq.gz  
 RNAPII\_Q140\_6m\_F\_rep4.fastq.gz  
 input\_WT\_2m\_F\_rep2.fastq.gz  
 input\_Q140\_2m\_F\_rep2.fastq.gz  
 H3K27ac\_WT\_2m\_F\_rep2.fastq.gz  
 H3K27me3\_WT\_2m\_F\_rep2.fastq.gz  
 RNAPII\_WT\_2m\_F\_rep2.fastq.gz  
 H3K27ac\_Q140\_2m\_F\_rep2.fastq.gz  
 H3K27me3\_Q140\_2m\_F\_rep2.fastq.gz  
 RNAPII\_Q140\_2m\_F\_rep2.fastq.gz  
 input\_WT\_20w\_M\_rep1\_NeuN+.fastq.gz  
 input\_WT\_20w\_M\_rep1\_NeuN-.fastq.gz  
 H3K27ac\_WT\_20w\_M\_rep1\_NeuN+.fastq.gz  
 H3K27me3\_WT\_20w\_M\_rep1\_NeuN+.fastq.gz  
 H3K27ac\_WT\_20w\_M\_rep1\_NeuN-.fastq.gz  
 H3K27me3\_WT\_20w\_M\_rep1\_NeuN-.fastq.gz  
 input\_WT\_2m\_M\_rep3.fastq.gz  
 input\_Q140\_2m\_M\_rep3.fastq.gz  
 H3K27ac\_WT\_2m\_M\_rep3.fastq.gz  
 H3K27me3\_WT\_2m\_M\_rep3.fastq.gz  
 RNAPII\_WT\_2m\_M\_rep3.fastq.gz

H3K27ac\_Q140\_2m\_M\_rep3.fastq.gz  
 H3K27me3\_Q140\_2m\_M\_rep3.fastq.gz  
 RNAPII\_Q140\_2m\_M\_rep3.fastq.gz  
 H3K27me3\_WT\_20w\_M\_rep2\_NeuN+.fastq.gz  
 H3K27me3\_WT\_20w\_M\_rep2\_NeuN-.fastq.gz  
 input\_WT\_20w\_M\_rep2\_NeuN+.fastq.gz  
 input\_WT\_20w\_M\_rep2\_NeuN-.fastq.gz  
 H3K27ac\_WT\_20w\_M\_rep2\_NeuN+.fastq.gz  
 H3K27ac\_WT\_20w\_M\_rep2\_NeuN-.fastq.gz  
 input\_WT\_6m\_M\_rep3.wig.gz  
 input\_Q140\_6m\_M\_rep3.wig.gz  
 H3K9me3\_WT\_6m\_M\_rep3.wig.gz  
 H3K27me3\_WT\_6m\_M\_rep3.wig.gz  
 H3K9me3\_Q140\_6m\_M\_rep3.wig.gz  
 H3K27me3\_Q140\_6m\_M\_rep3.wig.gz  
 input\_WT\_6m\_F\_rep4.wig.gz  
 input\_Q140\_6m\_F\_rep4.wig.gz  
 H3K27ac\_WT\_6m\_F\_rep4.wig.gz  
 H3K27me3\_WT\_6m\_F\_rep4.wig.gz  
 RNAPII\_WT\_6m\_F\_rep4.wig.gz  
 H3K27ac\_Q140\_6m\_F\_rep4.wig.gz  
 H3K27me3\_Q140\_6m\_F\_rep4.wig.gz  
 RNAPII\_Q140\_6m\_F\_rep4.wig.gz  
 input\_WT\_2m\_F\_rep2.wig.gz  
 input\_Q140\_2m\_F\_rep2.wig.gz  
 H3K27ac\_WT\_2m\_F\_rep2.wig.gz  
 H3K27me3\_WT\_2m\_F\_rep2.wig.gz  
 RNAPII\_WT\_2m\_F\_rep2.wig.gz  
 H3K27ac\_Q140\_2m\_F\_rep2.wig.gz  
 H3K27me3\_Q140\_2m\_F\_rep2.wig.gz  
 RNAPII\_Q140\_2m\_F\_rep2.wig.gz  
 input\_WT\_20w\_M\_rep1\_NeuN+.wig.gz  
 input\_WT\_20w\_M\_rep1\_NeuN-.wig.gz  
 H3K27ac\_WT\_20w\_M\_rep1\_NeuN+.wig.gz  
 H3K27me3\_WT\_20w\_M\_rep1\_NeuN+.wig.gz  
 H3K27ac\_WT\_20w\_M\_rep1\_NeuN-.wig.gz  
 H3K27me3\_WT\_20w\_M\_rep1\_NeuN-.wig.gz  
 input\_WT\_2m\_M\_rep3.wig.gz  
 input\_Q140\_2m\_M\_rep3.wig.gz  
 H3K27ac\_WT\_2m\_M\_rep3.wig.gz  
 H3K27me3\_WT\_2m\_M\_rep3.wig.gz  
 RNAPII\_WT\_2m\_M\_rep3.wig.gz  
 H3K27ac\_Q140\_2m\_M\_rep3.wig.gz  
 H3K27me3\_Q140\_2m\_M\_rep3.wig.gz  
 RNAPII\_Q140\_2m\_M\_rep3.wig.gz  
 H3K27me3\_WT\_20w\_M\_rep2\_NeuN+.wig.gz  
 H3K27me3\_WT\_20w\_M\_rep2\_NeuN-.wig.gz  
 input\_WT\_20w\_M\_rep2\_NeuN+.wig.gz  
 input\_WT\_20w\_M\_rep2\_NeuN-.wig.gz  
 H3K27ac\_WT\_20w\_M\_rep2\_NeuN+.wig.gz  
 H3K27ac\_WT\_20w\_M\_rep2\_NeuN-.wig.gz

Genome browser session  
(e.g. [UCSC](http://genome.ucsc.edu))

[http://genome.ucsc.edu/s/rafalcala/Q140HD\\_mm10](http://genome.ucsc.edu/s/rafalcala/Q140HD_mm10)

## Methodology

Replicates

We have generated a minimum of two independent biological replicates from ChIP-seq experiments, with exception of H3K9me3, for which only one biological replicate was generated for preliminary assessment

Sequencing depth

ChIP-seq samples were sequenced in Illumina HiSeq4000 in a pair-end 50 bp length configuration with exception of the second replicate for NeuN sorted based experiments, for which 100 bp length configuration was used. All samples showed >90% reads with high quality mapping to mm10

Antibodies

Rabbit polyclonal anti-Histone H3 (acetyl K27) - ChIP Grade Abcam Cat# ab4729, RRID:AB\_2118291  
 H3K27me3 rabbit polyclonal antibody ChIP-seq grade Diagenode Cat# C15410195, RRID:AB\_2753161  
 7C2 RNA Polymerase II antibody Besse et al. 1995 (Home made, IGBMC Strasbourg)  
 Anti-Histone H3 (try methyl K9) antibody - ChIP Grade Abcam Cat# ab8898, RRID:AB\_306848

|                         |                                                                                                                                                                                                                                                                                                                                                                                                                                                                                                                        |
|-------------------------|------------------------------------------------------------------------------------------------------------------------------------------------------------------------------------------------------------------------------------------------------------------------------------------------------------------------------------------------------------------------------------------------------------------------------------------------------------------------------------------------------------------------|
| Peak calling parameters | Sequence reads were mapped to reference genome mm10 using Bowtie 1.0.0 with the following parameters -m 1 --strata --best -y -S -l 40 -p 2. Peak detection of H3K27ac, RNAPII and H3K27me3 was performed using SICER59,60 v1.1 with the following parameters: window size: 200; e-value: 0.003. Gap size parameters were selected according to the score value estimated by statistical method implemented in SICER: selected values of gap size are 1000, 600 and 1400 for H3K27ac, RNAPII and H3K27me3, respectively |
| Data quality            | Only peaks with and FDR < 0.05 were used for initial peak calling and differences among conditions were considered only for FDR < 10 <sup>-5</sup>                                                                                                                                                                                                                                                                                                                                                                     |
| Software                | fastqc (v.0.11.5.), RTA (v.2.7.3), bcl2fastq (v.2.17.1.14.), Bowtie (v.1.0.0.), Bedtools (v.2.22.0), Sicer (v1.1.), Homer Annotate Peaks (v4.9.1), SeqMiner (1.3.4), RSAT peak-motifs, DESeq2(v.1.14)                                                                                                                                                                                                                                                                                                                  |

## Flow Cytometry

### Plots

Confirm that:

- The axis labels state the marker and fluorochrome used (e.g. CD4-FITC).
- The axis scales are clearly visible. Include numbers along axes only for bottom left plot of group (a 'group' is an analysis of identical markers).
- All plots are contour plots with outliers or pseudocolor plots.
- A numerical value for number of cells or percentage (with statistics) is provided.

### Methodology

|                           |                                                                                                                                                                                                                                                                                                                                                                                                                                                                                                                                                                     |
|---------------------------|---------------------------------------------------------------------------------------------------------------------------------------------------------------------------------------------------------------------------------------------------------------------------------------------------------------------------------------------------------------------------------------------------------------------------------------------------------------------------------------------------------------------------------------------------------------------|
| Sample preparation        | Mice were killed by cervical dislocation, striata were microdissected and fast-freeze on liquid nitrogen. Nuclei were extracted after cross-linking (ChIP-seq) or in native conditions ( NeuN population analysis) by mechanical tissue disruption and low detergent based nuclear isolation procedure. Nuclei were stained with a-NeuN antibody (Millipore Cat# MAB377) and Alexa-Fluor 488 (ThermoFisher Scientific Cat# A-21202) secondary antibody for ChIP-seq experiments and with RBFOX3/NeuN Antibody (1B7) [Alexa Fluor® 405] for NeuN population analysis |
| Instrument                | FACS ARIA FUSION and FACS ARIA II                                                                                                                                                                                                                                                                                                                                                                                                                                                                                                                                   |
| Software                  | BD FACSDiva v8                                                                                                                                                                                                                                                                                                                                                                                                                                                                                                                                                      |
| Cell population abundance | The purity of post-sorted fraction were >90-95% as determined by post-sorting analysis of purified fractions                                                                                                                                                                                                                                                                                                                                                                                                                                                        |
| Gating strategy           | Nuclei were first separated from remanent debris according to their size and granularity (FSC-A vs SSC-A). Singlets were gated in the linear relation between FSC-A and FSC-H. Finally, NeuN + and NeuN- nuclei were separated by their fluorescent signal of AF488 (ChIP-seq experiments) or AF405 ( NeuN population analysis). Population boundaries were clearly separated and post-sorting controls were performed.                                                                                                                                             |

- Tick this box to confirm that a figure exemplifying the gating strategy is provided in the Supplementary Information.
